# Supplementary material
Source: PubMed Central journal article supplement (PMC3079562)
Supplement: NIHMS257926-supplement-1.pdf [file NIHMS257926-supplement-1.pdf]

## Supplementary Information

### Radical-Mediated Enzymatic Carbon Chain Fragmentation-Recombination

Qi Zhang<sup>1</sup>, Yuxue Li<sup>2</sup>, Dandan Chen<sup>1</sup>, Yi Yu<sup>1</sup>, Lian Duan<sup>1</sup>, Ben Shen<sup>3</sup>, and Wen Liu<sup>1\*</sup>

<sup>1</sup>State Key Laboratory of Bioorganic and Natural Products Chemistry, Shanghai Institute of Organic Chemistry, Chinese Academy of Sciences, 345 Lingling Rd., Shanghai 200032, China

<sup>2</sup>State Key Laboratory of Organometallic Chemistry, Shanghai Institute of Organic Chemistry, Chinese Academy of Sciences, 345 Lingling Rd., Shanghai 200032, China

<sup>3</sup>Division of pharmaceutical Sciences, School of Pharmacy, University of Wisconsin-Madison, 777 Highland Ave., Madison, Wisconsin 53705, USA

Corresponding Author: [wliu@mail.sioc.ac.cn](mailto:wliu@mail.sioc.ac.cn),

## Table of contents

### 1. Supplementary Methods

- 1.1 General Materials and Methods.
- 1.2 Gene Cloning and Expression.
- 1.3 Protein Purification and Characterization.
- 1.4 Determination of the Products, Shunt Products, and Intermediate in NosL-Catalyzed Conversion.
- 1.5 Determination of 5'-fluoro-NOS (**27**).
- 1.6 Synthesis.
- 1.7 Theoretical Calculations.
- 1.8 *In vitro* Susceptibility Testing.

### 2. Supplementary Results

#### 2.1 Supplementary Figures

- Supplementary Figure 1** Time course analysis of MIA production in *nosL*-expressing strain.
- Supplementary Figure 2** Multiple sequence alignment of selected radical *S*-AdoMet proteins.
- Supplementary Figure 3** HPLC analysis of MIA production in the recombinant *E. coli* strains.
- Supplementary Figure 4** Quantitative analysis of NosL-catalyzed *in vitro* conversion.
- Supplementary Figure 5** Characterization of the reconstituted NosL.
- Supplementary Figure 6** NosL-catalyzed MIA formation *in vitro*.
- Supplementary Figure 7**  $^{13}\text{C}$  NMR spectra of labeled MIAs.
- Supplementary Figure 8** Partial  $^1\text{H}$  NMR spectrum of the mixture of MIA (**1**) and [ $^2\text{H}_6$ ]MIA (**5**).
- Supplementary Figure 9** GC-EI-MS analysis of 3-methylindole (**6**) production in NosL-catalyzed *in vitro* conversion.
- Supplementary Figure 10** Characterization of glyoxylate-DNP (**8**).
- Supplementary Figure 11** Characterization of formaldehyde-DNP (**10**).
- Supplementary Figure 12** Plot of the spin density of L-Trp neutral radical (**11**).

**Supplementary Figure 13** Structures and relative free energies of the cleavage products of L-Trp neutral radical (**11**).

**Supplementary Figure 14** Characterization of Gly-Dansyl (**22**).

**Supplementary Figure 15** Characterization of Met-Dansyl (**24**).

**Supplementary Figure 16** HPLC analysis of the production of fluorinated MIAs in *E. coli* strains.

**Supplementary Figure 17**  $^{19}\text{F}$  NMR spectra of fluorinated MIAs.

**Supplementary Figure 18** Characterization of 5'-fluoro-NOS (**27**).

**Supplementary Figure 19** Spectra of 5'-fluoro-NOS (**27**) for structural elucidation.

## 2.2 Supplementary Tables

**Supplementary table1** Bacteria strains and plasmids used in this study.

**Supplementary table2** Primers used in this study.

**Supplementary table3** Evaluation of the substrate specificity of NosL in the *nosL*-expressing *E. coli* strain.

**Supplementary table4** Assignment of  $^1\text{H}$  NMR and  $^1\text{H}$ - $^{13}\text{C}$  correlations (HSQC) of 5'-fluoro-NOS (**27**).

**Supplementary table5** Minimum inhibitory concentrations (MICs) of NOS and 5'-fluoro-NOS (**27**).

## 3. Supplementary References

## 1. Supplementary Methods

### 1.1. General Materials and Methods

**Materials.** Biochemicals and media were purchased from Sinopharm Chemical Reagent Co. Ltd. or Oxoid Ltd. unless otherwise stated. Restriction enzymes were from TaKaRa Biotechnology Co. Ltd.. Chemicals, including 5-fluoro-DL-Trp ( $\geq 99\%$  purity) and 6-fluoro-DL-Trp (98% purity), were from Sigma-Aldrich Co. Ltd., except L-[ $^2\text{H}_8$ ]-Trp (98% purity), L-[1- $^{13}\text{C}$ ]-Trp (99% purity), and L-[3- $^{13}\text{C}$ ]-Ser (99% purity), which were purchased from Cambridge Isotope Laboratory Co. Ltd..

**DNA Isolation, Manipulation, and Sequencing.** DNA isolation and manipulation in *E. coli* were carried out according to the standard methods<sup>1</sup>. PCR amplifications were carried out on an Authorized Thermal Cycler (Eppendorf AG 22331 Hamburg, Germany) using either *Taq* DNA polymerase or PfuUltra™ High-Fidelity DNA polymerase (Dalian Takara Biotechnology Co. Ltd., China). Primer synthesis and DNA sequencing were performed at the Shanghai Invitrogen Biotech Co. Ltd. and Chinese National Human Genome Center.

**Sequence Analysis.** Protein comparison was carried out by available BLAST methods (<http://www.ncbi.nlm.nih.gov/blast/>). Amino acid sequence alignment was performed by the CLUSTALW method, and the DRAWTREE and DRAWGRAM methods, respectively, from BIOLOGYWORKBENCH 3.2 software (<http://workbench.sdsc.edu>).

**Compound Analysis.** High performance liquid chromatography (HPLC) analysis was carried out on a

JASCO LC-2000 HPLC system (Tokyo, Japan), or on an Agilent™ 1100 HPLC system (Agilent Technologies Inc., USA). Electrospray ionization MS (ESI-MS) was performed on a Thermo Fisher LTQ Fleet ESI-MS spectrometer (Thermo Fisher Scientific Inc., USA). Gas chromatography (GC)-MS analysis was performed on an Agilent 7890A/3973 GC-MS system (Agilent Technologies Inc., USA). ESI-high resolution MS (ESI-HR-MS) analysis was carried out on a Bruker APEXIII 70 Tesla FT-MS system (Bruker Co., Ltd., Germany). NMR data were recorded on Varian Mercury 300 and Varian Unity Inova 600 (Varian Inc., USA), or on Bruker AV400 and Bruker AV500 spectrometers (Bruker Co. Ltd., Germany).

## 1.2. Gene Cloning and Expression

***Constructs for Gene Expression in Escherichia coli BL21 (DE3).*** A 1.2 kb PCR product containing *nosL* was amplified by PCR using the primer pair NosL-for and NosL-Rev from pSL4001, a pOJ446-based *S. actuosus* genomic library cosmid that contains the nosiheptide (NOS) biosynthetic gene cluster<sup>2</sup>, and then cloned into pSP72 to yield pSL4100. After sequencing to confirm the fidelity, the 1.2 kb EcoRI/HindIII fragment was recovered from pSL4100 and ligated into the same site of pET28a, making the recombinant construct pSL4101 for expressing *nosL* to give the *N*-terminally 6 x His-tagged protein.

Similarly, the flavodoxin-encoding gene *fldA* and the flavodoxin reductase-encoding gene *fpr* were cloned by PCR from *E. coli* BL21(DE3) to constitute the *N*-terminally 6 x His-tagged, natural reduction system: a 0.5 kb EcoRI/SalI product amplified with the primer pair FldA-for and FldA-rev was inserted into pET28a, making the recombinant plasmid pSL4110 for expressing *fldA*; and a 0.75 kb EcoRI/HindIII product amplified with the primer pair Fpr-for and Fpr-rev was inserted into pET28a, making the recombinant plasmid pSL4111 for expressing *fpr*.

**Site-Specific Mutagenesis for Expressing Mutant *nosL*.** The recombinant plasmid pSL4100 (pSP72 derivative) that contains a 1.2 kb fragment encoding NosL serves as the template. To evaluate the [4Fe-4S] binding potential, PCR amplifications were carried out by using the primer pair NLC95A-for and NLC95A-rev for mutation of C95, the primer pair NLC99A-for and NLC99A-rev for mutation of C99, and the primer pair NLC102A-for and NLC102A-rev for mutation of C102, respectively, to Ala in the characteristic CxxxCxxC motif. To evaluate the *S*-AdoMet binding potential, PCR amplification was performed by using the primer pair NLG142A-for and NLG142A-rev for mutation of the conserved G142 to Ala. After sequencing to confirm the fidelity, the mutant DNA fragments were cloned individually into pET28a, yielding the recombinant constructs for producing NosL mutants (i.e. pSL4103 for C95A, pSL4105 for C99A, pSL4107 for C102A, and pSL4109 for G142A).

### 1.3. Protein Purification and Characterization

**Production and Aerobic Purification of *NosL*, *FldA* and *Fpr*.** The constructs pSL4101, pSL4110 and pSL4111 were introduced into *E. coli* BL21 (DE3), yielding the recombinant strains SL4101, SL4110 and SL4111, respectively, for overproduction of NosL, FldA and Fpr. Cells for each protein production were cultured in the Luria-Bertani (LB) medium supplemented with 50-100 µg/mL of kanamycin at 37°C and 250 rpm until the cell density reached 0.6-0.8 at OD<sub>600 nm</sub>. To induce protein expression, IPTG (0.05-0.1 mM) was added to the cultures, which were further incubated at 25-30°C for 8-12 hr. The soluble fraction for each overproduced protein was loaded onto a Ni-NTA resin (Qiagen, Valencia, USA) column for affinity purification. The purified proteins were dialyzed against cold TSG buffer (50 mM Tris-HCl, 25 mM NaCl, 10% glycerol and 0.02% NaN<sub>3</sub>, pH 8.0) overnight at 4°C. The resulting proteins were

concentrated with an ultracentrifugation filter (Millipore, Billerica, USA) and then stored at -80°C for *in vitro* assays. The purity of proteins was examined by 12% SDS-PAGE analysis, and the concentration was determined by Bradford assay using bovine serum albumin (BSA) as a standard.

***Production and Anaerobic Purification of NosL.*** The recombinant strain SL4101 was cultured in *E. coli* BL21(DE3) and induced by isopropyl- $\beta$ -D-thiogalactopyranoside (IPTG) for NosL production. The purification then proceeded in an anaerobic glove box (Coy Laboratory Product Inc., USA) with less than 2 ppm of O<sub>2</sub>. The cells were collected from 1 L of the culture broth and resuspended in 20 ml of the lysis buffer (50 mM MOPS, 300 mM NaCl, and 10% glycerol, pH 8.0). In the presence of 2 mg of lysozyme, the suspension was stirred for 1 hr at the room temperature, and broken up by a sonicator (Sonics & Materials, Inc., USA) on ice after adding of 0.1 ml of phenylmethylsulfonyl fluoride (20 mg/ml in isopropyl alcohol). While the cell debris was removed by centrifugation, the supernatant was incubated with 4 ml of Ni-NTA resin pre-equilibrated with the lysis buffer, and then subjected to affinity purification on a column. The purified protein was concentrated with an ultracentrifugation filter to 100  $\mu$ M and the purity (>90%) was determined by 12% SDS-PAGE analysis.

***Characterization of the Reconstituted NosL.*** Measurement of the absorbance was carried out on a JASCO V-530 UV/Vis spectrophotometer (Tokyo, Japan), in a cuvette sealed with rubber septa to minimize air exposure. The quantification of Fe and S atoms per molecule of the protein was performed in duplicate according to the methods previously described<sup>3,4</sup>. EPR analysis was carried out on a Bruker EMX plus 10/12 spectrometer system (Bruker Co., Ltd., Germany) at High Magnetic Field Laboratory, Chinese Academy of Sciences, Hefei, China. The reconstituted NosL (100  $\mu$ M) in the presence of 2 mM sodium

dithionite was loaded into a quartz EPR tube, frozen in liquid nitrogen and then stored in dry ice before recording the spectrum.

#### 1.4. Determination of the Products, Shunt Products, and Intermediate in NosL-Catalyzed Conversion

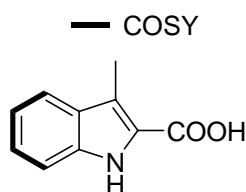

3-methyl-2-indolic acid, MIA, **1**

**MIA (Product).** HPLC analysis was carried out on an Agilent ZORBAX SB-C18 column (4.6 x 150 mm, product number 993967-902). The column was equilibrated with 85% solvent A (H<sub>2</sub>O, 0.1% TFA) and 15% solvent B (CH<sub>3</sub>CN, 0.1% TFA), and developed at a flow rate of 1 ml/min and UV detection at 298 nm: 0-3 min, constant 85% A/15% B; 3-6 min, a linear gradient to 60% A/40% B; 6-12 min, constant 60% A/40% B; and 12-20 min, a linear gradient to 45%A/55% B. For isolation, 2 L of the *nosL*-expressing culture broth was centrifuged. The supernatant was adjusted to pH 2.8 with 2M HCl and extracted twice by 500 ml of the mixture of CH<sub>2</sub>Cl<sub>2</sub> and n-butanol (with the ratio 4:1), while the precipitate was soaked by 200 ml of tetrahydrofuran (THF) for 2-3 hr before the filtration. Both the organic phases were combined, evaporated to dryness and then re-dissolved in 5 ml of THF. After centrifugation and filtration to remove the precipitate, the product was purified by semi-preparative HPLC on an Agilent ZORBAX SB-C18 column (9.4 x 250 mm, product number 880975-202) that was equilibrated with the solvents A (55%) and B (45%), under the program (0-20 min, constant 55% A/45% B) at a flow rate of 2.2 ml/min. <sup>1</sup>H NMR (400 MHz, d<sub>6</sub>-DMSO): δ 11.28 (s, 1H), 7.60 (d, J = 8.02, 1H), 7.37 (d, J = 8.15, 1H), 7.20 (m, 1H ), 7.02

(m, 1H ), 2.50 (s, 3H);  $^{13}\text{C}$  NMR (100 MHz,  $\text{d}_6\text{-DMSO}$ ):  $\delta$  164.0, 135.9, 127.9, 125.1, 124.2, 120.1, 119.0, 116.9, 112.2, 9.7; UV/Vis  $\lambda_{\text{max}}$  230 nm and 298 nm; HR-ESI-MS ( $m/z$ ):  $[\text{M-H}]^-$  calcd. for  $\text{C}_{10}\text{H}_8\text{O}_2\text{N}$ , 174.05615; found, 174.05605.

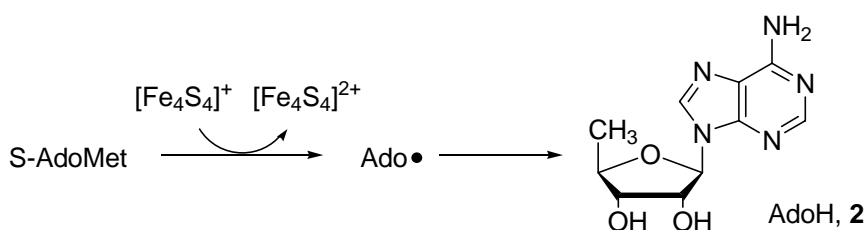

**AdoH (Product).** AdoH production was measured in NosL-catalyzed *in vitro* conversion, using either L-Trp or L- $[\text{}^2\text{H}_8]$ Trp as the substrate. HPLC analysis was carried out on an Agilent ZORBAX SB-C18 column (4.6 x 250 mm, product number 880975-902). The column was equilibrated with 2% solvent A ( $\text{H}_2\text{O}$ , 0.1% TFA) and 98% solvent B ( $\text{CH}_3\text{CN}$ , 0.1% TFA), and developed at a flow rate of 1.0 ml/min and UV detection at 260 nm: 0-3 min, constant 98% A/2% B; and 3-20 min, a linear gradient to 80% A/20% B. HR-ESI-MS ( $m/z$ ):  $[\text{M+H}]^+$  calcd. for  $\text{C}_{10}\text{H}_{14}\text{N}_5\text{O}_3$ , 252.10967; found 252.10983.

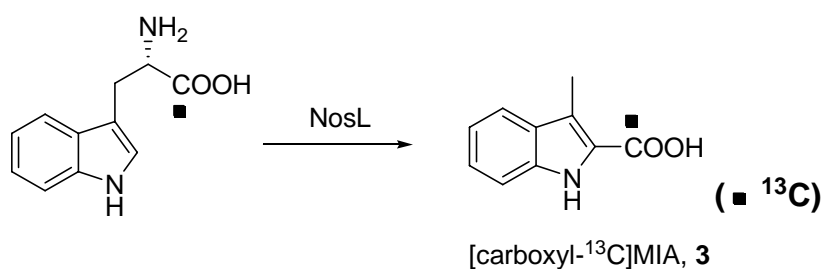

**[Carboxyl- $^{13}\text{C}$ ]MIA (Product).** Feeding of L- $[\text{}^1\text{}^{13}\text{C}]$ Trp was conducted as described in Methods of the text. The isolation, purification and analysis were performed in the same ways to those for MIA. The  $^1\text{H}$  NMR (400 MHz,  $\text{d}_6\text{-DMSO}$ ) spectrum was identical to that of MIA. The enriched signal at  $\delta$ 164.0 in  $^{13}\text{C}$  NMR (400 MHz,  $\text{d}_6\text{-DMSO}$ ) spectrum was found.

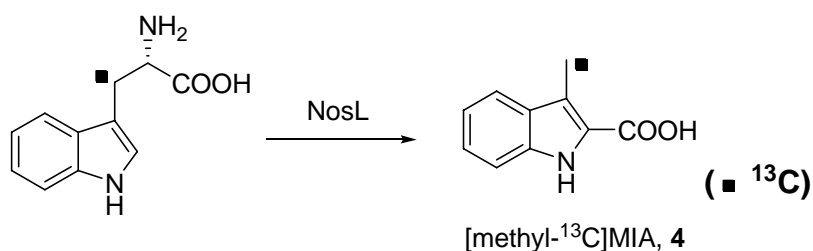

**[Methyl- $^{13}\text{C}$ ]MIA (Product).** Feeding of L-[3- $^{13}\text{C}$ ]Trp was conducted as described in Methods of the text.

The isolation, purification and analysis were performed in the same ways to those for MIA. The  $^1\text{H}$  NMR (400 MHz,  $\text{d}_6\text{-DMSO}$ ) spectrum was identical to that of MIA. The enriched signal at  $\delta$  8.83 in  $^{13}\text{C}$  NMR (400 MHz,  $\text{d}_6\text{-DMSO}$ ) spectrum was found.

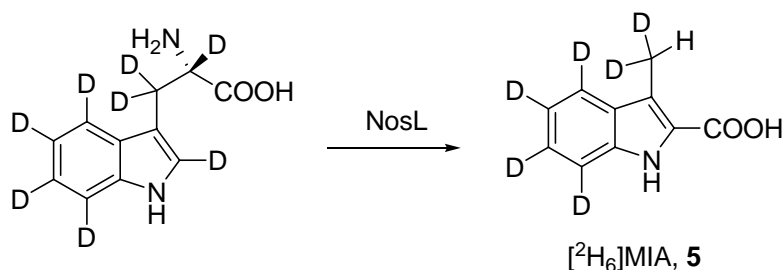

**[ $^2\text{H}_6$ ]MIA (Product).** Feeding of L-[ $^2\text{H}_8$ ]Trp was conducted as described in Methods of the text. The isolation, purification and analysis were performed in the same ways to those for MIA. The signal at  $\delta$  2.44 (m), 0.04 ppm upfield-shifted from  $\delta$  2.48 (s) in  $^1\text{H}$  NMR (500 MHz,  $\text{CD}_3\text{OD}$ ) spectrum, and the signal at  $\delta$  23.4, 0.5 ppm upfield-shifted from  $\delta$  23.9 in  $^{13}\text{C}$  NMR (100MHz,  $\text{d}_8\text{-THF}$ ) spectrum, corresponding to  $\text{CHD}_2$  relative to  $\text{CH}_3$  were found.  $^{13}\text{C}$  NMR (100 MHz,  $\text{d}_8\text{-THF}$ , for the mixture of **1** and **5**):  $\delta$ 163.7, 162.1, 137.5, 129.3, 129.2, 125.3, 125.1, 120.9, 119.8, 119.2, 119.1, 116.9, 112.5, 23.9, 23.4; HR-ESI-MS ( $m/z$ ):  $[\text{M-H}]^-$  calcd. for  $\text{C}_{10}\text{H}_2\text{D}_6\text{O}_2\text{N}$ , 180.09371; found, 180.09343.

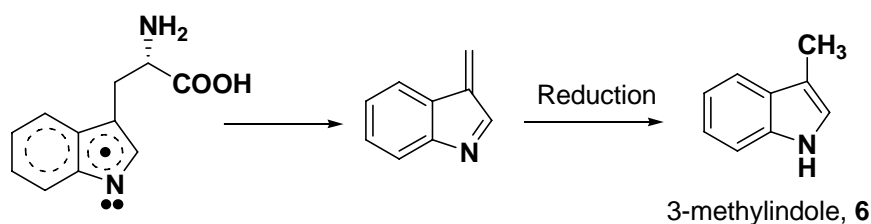



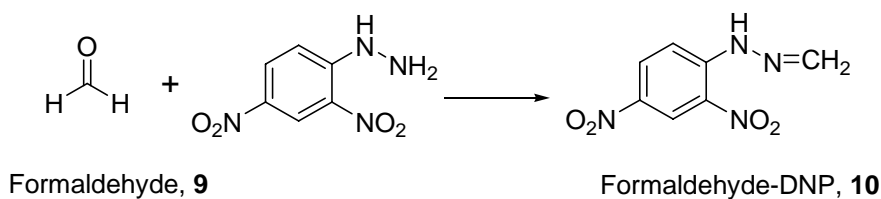

**Formaldehyde (Product).** Formaldehyde (**9**) production was measured by derivatization with DNP in NosL-catalyzed *in vitro* conversion, using L-Trp as the substrate. HPLC-MS analysis was performed according to the method identical to that for glyoxylate examination. For 1-(2,4)-dinitrophenyl)-2-methylene hydrazine (Formaldehyde-DNP, **10**), UV/Vis  $\lambda_{\text{max}}$  210 nm, 262 nm, and 346 nm; ESI-MS ( $m/z$ ):  $[M-H]^-$  calcd. for  $C_7H_5N_4O_4$ , 209.0; found 209.2.

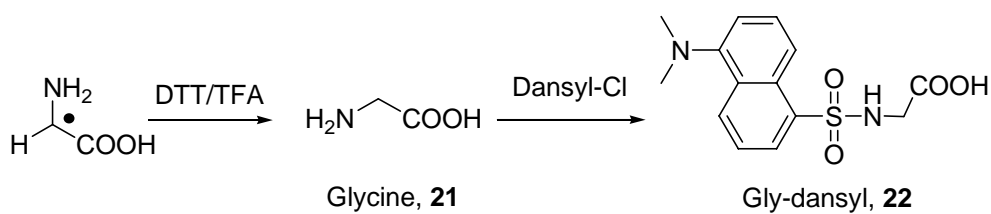

**Glycine (putative derivative of glycy radical).** The examination of glycine (**21**) was carried out by quenching NosL-catalyzed *in vitro* conversion at 10 sec, before derivatization with dansyl chloride. HPLC-MS analysis was carried out on an Agilent ZORBAX SB-C18 column (4.6 x 150 mm, product number 993967-902). The column was equilibrated with 90% solvent A ( $H_2O$ , 0.1% Formic acid) and 10% solvent B ( $CH_3CN$ , 0.1% TFA), and developed at a flow rate of 1.0 ml/min and UV detection at 285 nm: 0-3 min, constant 90% A/10% B; 3-6 min, a linear gradient to 70% A/30% B; 6-12 min, constant 70% A/30% B; and 12-20 min, a linear gradient to 50% A/50% B. For Gly-dansyl (**22**), UV/Vis  $\lambda_{\text{max}}$  224 nm, 285 nm, and 322 nm; ESI-MS ( $m/z$ ):  $[M+H]^+$  calcd. for  $C_{14}H_{17}N_2O_4S$ , 309.1; found 309.4.

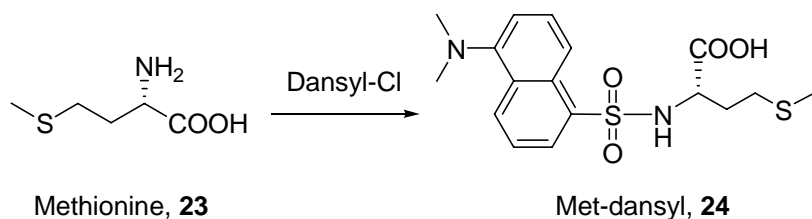

**L-Met (Product).** L-Methionine (**23**) production was measured by derivatization with dansyl chloride in NosL-catalyzed *in vitro* conversion as described above for glycine examination. HPLC-MS analysis was performed according to the method identical to that for Gly-dansyl detection. For Met-dansyl (**24**), UV/Vis  $\lambda_{\max}$  224 nm, 285 nm, and 322 nm; ESI-MS ( $m/z$ ):  $[M+H]^+$  calcd. for  $C_{17}H_{23}N_2O_4S_2$ , 382.1; found 383.2.

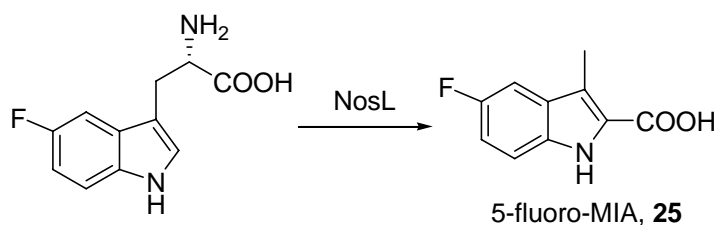

**5-Fluoro-MIA (Product).** Feeding of 5-fluoro-DL-Trp was conducted as described in Methods of the text. The isolation, purification and analysis were performed in the same ways to those for MIA.  $^1H$  NMR (400 MHz,  $d_6$ -DMSO):  $\delta$  11.21 (s, 1H), 7.30 (m, 2H), 6.99 (m, 1H), 2.46 (s, 3H);  $^{13}C$  NMR (100MHz,  $d_6$ -DMSO):  $\delta$  156.7, 154.4, 131.1, 127.1, 117.0, 112.2, 112.1, 111.5, 111.1, 103.1, 102.8, 17.4;  $^{19}F$  NMR (376 MHz,  $d_6$ -DMSO):  $\delta$  -119.6; UV/Vis  $\lambda_{\max}$  227 nm, 242 nm, and 302 nm; HR-ESI-MS ( $m/z$ ):  $[M-H]^-$  calcd. for  $C_{10}H_7FO_2N$ , 192.04663; found, 192.04637.

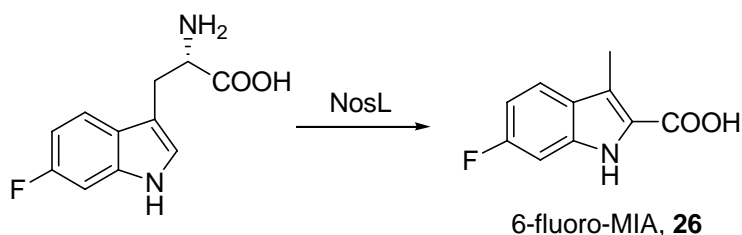

**6-Fluoro-MIA (Product).** Feeding of 6-fluoro-DL-Trp was conducted as described in Methods of the text.

The isolation, purification and analysis were performed in the same ways to those for MIA.  $^1\text{H}$  NMR (400 MHz,  $d_8$ -THF)  $\delta$  10.56 (s, 1H),  $\delta$  7.47 (dd,  $J$  = 8.8, 5.4, 1H), 6.92 (dd,  $J$  = 9.8, 2.2, 1H), 6.72 (m, 1H), 2.45 (s, 3H);  $^{13}\text{C}$  NMR (100 MHz,  $d_8$ -THF):  $\delta$  163.6, 161.4, 137.5, 137.3, 126.2, 125.8, 122.4, 122.3, 119.6, 116.9, 23.5;  $^{19}\text{F}$  NMR (282 MHz,  $\text{CD}_3\text{OD}$ )  $\delta$  -120.2; UV/Vis  $\lambda_{\text{max}}$  227 nm, 242 nm, and 302 nm; HR-ESI-MS ( $m/z$ ):  $[\text{M}-\text{H}]^-$  calcd. for  $\text{C}_{10}\text{H}_7\text{FO}_2\text{N}$ , 192.04663; found, 192.04624.

### 1.5. Determination of 5'-fluoro-NOS

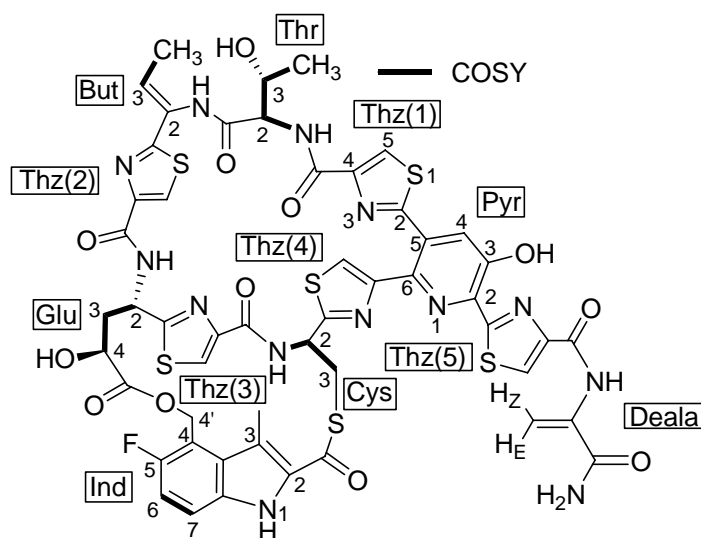

5'-fluoro-NOS, **27**

**5'-fluoro-NOS.** The fermentation, isolation and analysis were carried out similar to the methods described previously<sup>5</sup>. For 5'-fluoro-NOS (**27**) production, 5-fluoro-DL-Trp was supplemented to the fermentation culture of *S. actuosus* at 28-32 hr and 52-56 hr, respectively, to a final concentration of 0.2 mM.  $^1\text{H}$  NMR (600 MHz,  $d_8$ -THF):  $\delta$  10.76 (br, 1H), 10.19 (s, br, 1H), 9.81 (s, 1H), 8.76 (s, 1H), 8.63 (s, br, 1H), 8.32 (s, 1H), 8.13 (s, 1H), 7.93 (s, 1H), 7.79 (m, 1H), 7.77 (s, 1H), 7.70 (s, 1H), 7.43 (d,  $J$  = 9.50, 2H), 7.09 (m, 1H), 6.89 (br, 1H), 6.52 E (s, 1H), 6.33 (q,  $J$  = 7.00, 1H), 5.86 (m, 1H), 5.69 (t,  $J$  = 10.50, 1H), 5.45 Z (s, 1H), 5.42 (m, 2H), 4.32 (m, 1H), 3.89 (m, 2H), 2.09 (s, 3H), 1.67 (d,  $J$  = 6.00, 3H), 0.75 (d,  $J$  = 6.50, 3H);

$^{13}\text{C}$  NMR (150 MHz,  $\text{d}_8\text{-THF}$ ):  $\delta$  177.9, 173.9, 171.7, 171.4, 170.7, 168.2, 167.8, 166.4, 165.9, 161.8, 160.7, 160.4, 159.0, 158.1, 156.6, 155.9, 152.9, 152.9, 152.0, 151.7, 151.5, 149.8, 145.5, 135.6, 135.5, 135.4, 132.9, 131.9, 130.5, 129.0, 128.1, 127.2, 126.9, 126.8, 125.7, 125.1, 121.5, 120.0, 117.2, 115.6, 68.0, 64.6, 58.4, 58.3, 50.9, 46.8, 35.3, 29.9, 23.2, 21.5, 14.7;  $^{19}\text{F}$  NMR (376 MHz,  $\text{d}_6\text{-DMSO}$ ):  $\delta$  -126.5; UV/Vis  $\lambda_{\text{max}}$  222 nm and 357 nm; HR-ESI-MS ( $m/z$ ):  $[\text{M}-\text{H}]^-$  calcd. for  $\text{C}_{51}\text{H}_{41}\text{FN}_{13}\text{O}_{12}$ , 1238.13114; found 1238.12959; Tandem ESI-MS (Positive ion scanning): 1239.9, 1220.0, 1196.0, 1149.4, 1116.0, 1035.1, 956.7, 904.7. Assignment of the  $^1\text{H}$  NMR and  $^1\text{H}$ - $^{13}\text{C}$  COSY correlations (HSQC) of 5'-fluoro-NOS was summarized in Supplementary Table S4.

## 1.6. Synthesis

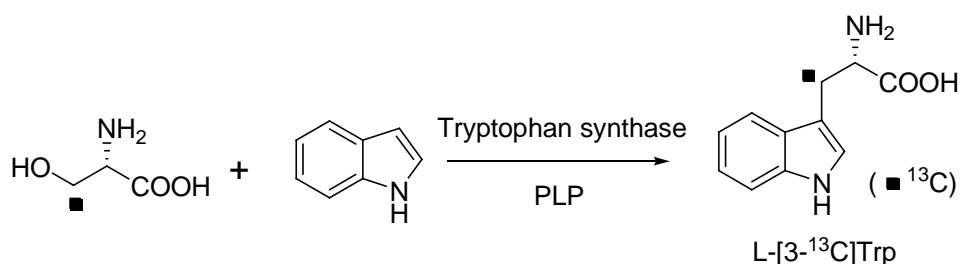

**L-[3- $^{13}\text{C}$ ]Trp.** Using indole and L-[3- $^{13}\text{C}$ ]Ser as the substrates, L-[3- $^{13}\text{C}$ ]Trp was synthesized enzymatically by tryptophan synthase according to the method described previously<sup>6</sup>.  $^1\text{H}$  NMR (400MHz,  $\text{D}_2\text{O}$ ):  $\delta$  7.62 (d,  $J$  = 8.0, 1H), 7.43 (d,  $J$  = 8.0, 1H), 7.18 (t,  $J$  = 8.0, 1H), 7.10 (t,  $J$  = 7.6, 1H), 3.94 (dd,  $J$  = 8.0, 4.4, 1H), 3.37 (dd,  $J$  = 15.2, 4.4, 1H), 3.19 (dd,  $J$  = 15.2, 4.4, 1H);  $^{13}\text{C}$  NMR (100MHz,  $\text{D}_2\text{O}$ ):  $\delta$  26.3 (enriched), ESI-MS ( $m/z$ ):  $[\text{M}+\text{H}]^+$  calcd. for  $\text{C}_{10}^{13}\text{CH}_{13}\text{N}_2\text{O}_2$ , 206.1; found 206.1.

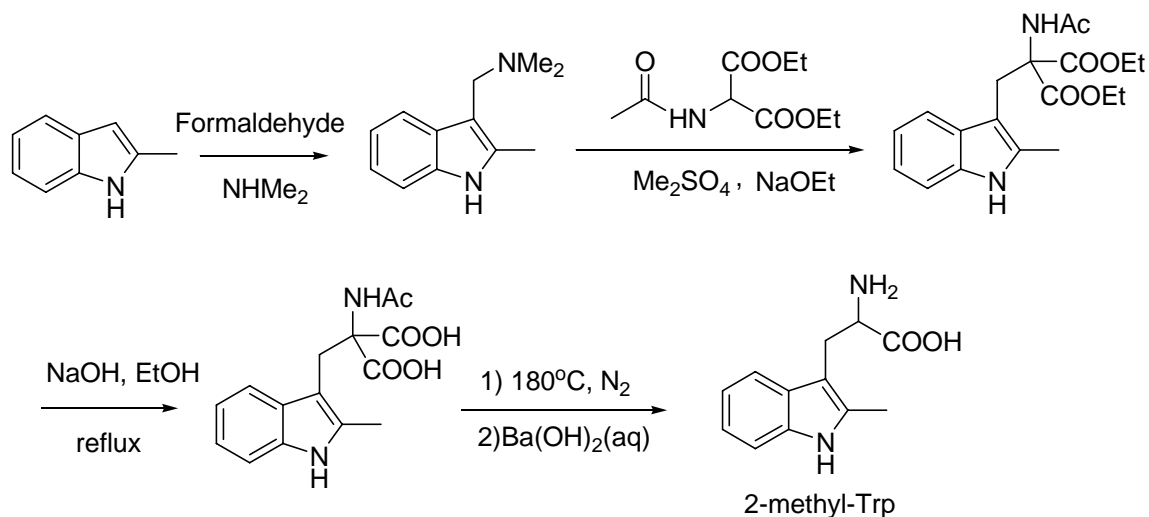

**2-Methyl-Trp.** A previously reported method<sup>7</sup> was utilized to synthesize 2-methyl-Trp, giving 300 mg of the product as a white powder (approximately 30% for the overall yield). <sup>1</sup>H NMR (400 MHz, d<sub>6</sub>-DMSO): δ 8.17 (s, 1H), 7.43 (d, J = 8.0, 1H), 7.24 (d, J = 8.0, 1H), 6.99 (m, 1H), 6.93 (m, 1H), 3.96 (dd, J = 8.0 Hz, 5.2 Hz, 1H), 3.16 (dd, J = 5.2 Hz, 5.2 Hz, 2H), 2.30 (s, 3H); <sup>13</sup>C NMR (100 MHz, d<sub>6</sub>-DMSO): δ 171.2, 134.7, 132.1, 128.5, 120.7, 118.8, 117.6, 110.9, 105.2, 53.2, 26.2, 11.9; ESI-MS (*m/z*): [M+H]<sup>+</sup> calcd. for C<sub>12</sub>H<sub>15</sub>N<sub>2</sub>O<sub>2</sub>, 219.1, found 219.1.

### 1.7. Theoretical Calculations

Density functional theory (DFT)<sup>8,9</sup> studies have been performed with the Gaussian03 program<sup>10</sup> using the unrestricted B3LYP<sup>11,12</sup> method and the 6-311+G\*\* basis set. The optimized structures were all checked with harmonic vibration frequency calculations. The solvent effect was estimated with IEFPCM<sup>13,14</sup> (UAHF atomic radii) method in water ( $\epsilon=78.39$ ) using the gas-phase optimized structures. Calculated total energies and geometrical coordinates of the possible intermediates are listed below.

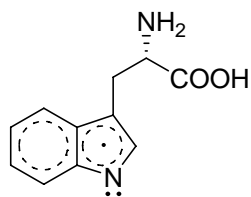

L-trp neutral radical, **11**

*L-Trp neutral radical (11) in Fig. 3, and Supplementary Figs. 12 and 13.*

SCF Done: E(UB3LYP) = -685.908051360 Hartree  
 <S\*\*2> = 0.7671 S = 0.5085

|                                               |                             |
|-----------------------------------------------|-----------------------------|
| Zero-point correction =                       | 0.204958 (Hartree/Particle) |
| Thermal correction to Energy =                | 0.217770                    |
| Thermal correction to Enthalpy =              | 0.218714                    |
| Thermal correction to Gibbs Free Energy =     | 0.162813                    |
| Sum of electronic and zero-point Energies =   | -685.703093                 |
| Sum of electronic and thermal Energies =      | -685.690282                 |
| Sum of electronic and thermal Enthalpies =    | -685.689338                 |
| Sum of electronic and thermal Free Energies = | -685.745238                 |
| Sum of electronic and thermal Free Energies = | -685.745238                 |

C,0,-0.933016951,2.1721841811,-0.3441489279  
 C,0,-0.2977887731,0.8861110344,-0.530664048  
 N,0,-2.1959157246,2.0863556905,0.0007700678  
 H,0,-0.4465509185,3.1282936051,-0.4854860108  
 C,0,1.1151209861,0.5991202677,-0.9156869827  
 H,0,1.7680607059,1.4160551608,-0.5947190635  
 H,0,1.4429986278,-0.3089270357,-0.3986437783  
 C,0,1.3299079138,0.3513916047,-2.4387387576  
 C,0,1.3759747707,1.6771518864,-3.2313662144  
 O,0,2.1012699982,1.6076832148,-4.3574825493  
 O,0,0.7991792474,2.6746380966,-2.8910854647  
 N,0,2.5124413278,-0.448014996,-2.7878112363  
 H,0,3.3187233094,-0.2006300939,-2.2209579989  
 H,0,2.3476237681,-1.4416481002,-2.6770953407  
 H,0,2.5258611655,0.7243545391,-4.351826162  
 H,0,0.4593015576,-0.1859235508,-2.8295230745  
 C,0,-1.3951507985,-1.4672616806,-0.2459867913  
 C,0,-1.330923434,-0.0715289651,-0.2628742354  
 C,0,-2.6127163505,-2.0776620316,0.0802436865  
 H,0,-0.5262078671,-2.0773147871,-0.4726240962  
 C,0,-2.4822743066,0.7039512313,0.0576390762  
 C,0,-3.7347968658,-1.3064122039,0.3858115719  
 H,0,-2.684496418,-3.1588575249,0.0980263273  
 C,0,-3.6799898883,0.1019743431,0.3802834417  
 H,0,-4.6672118746,-1.7997741994,0.6360044499  
 H,0,-4.5507482378,0.6993609734,0.6233904513

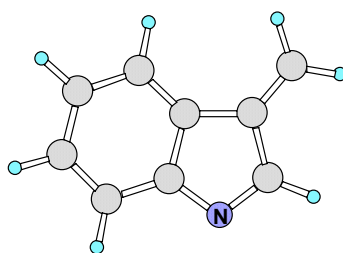

**12**

**12 in Fig. 3 and Supplementary Fig. 13.**

SCF Done: E(UB3LYP) = -401.690159730 Hartree  
 <S\*\*2>= 0.7650 S= 0.5075

|                                               |                             |
|-----------------------------------------------|-----------------------------|
| Zero-point correction =                       | 0.132151 (Hartree/Particle) |
| Thermal correction to Energy =                | 0.139663                    |
| Thermal correction to Enthalpy =              | 0.140607                    |
| Thermal correction to Gibbs Free Energy =     | 0.099531                    |
| Sum of electronic and zero-point Energies =   | -401.558009                 |
| Sum of electronic and thermal Energies =      | -401.550497                 |
| Sum of electronic and thermal Enthalpies =    | -401.549553                 |
| Sum of electronic and thermal Free Energies = | -401.590629                 |

|                              |              |        |
|------------------------------|--------------|--------|
| (Unpolarized solute)-Solvent | (kcal/mol) = | -48.48 |
| (Polarized solute)-Solvent   | (kcal/mol) = | -49.69 |
| Solute polarization          | (kcal/mol) = | 0.67   |
| Total electrostatic          | (kcal/mol) = | -49.02 |
| Cavitation energy            | (kcal/mol) = | 18.52  |
| Dispersion energy            | (kcal/mol) = | -18.88 |
| Repulsion energy             | (kcal/mol) = | 3.20   |
| Total non electrostatic      | (kcal/mol) = | 2.85   |
| DeltaG (solv)                | (kcal/mol) = | -46.18 |

C,0,-0.1898097223,0.4859838643,0.0000093344  
 C,0,0.2632491434,-0.8961987237,0.0000052607  
 C,0,1.6447592294,-1.2336358999,-0.0000011357  
 C,0,2.5443812786,-0.1971258278,-0.0000027004  
 C,0,2.0953072317,1.1567786068,0.0000007616  
 C,0,0.7242201841,1.5070357696,0.0000057741  
 C,0,-1.6554500139,0.3873828899,0.0000077069  
 C,0,-1.8866297637,-1.0542049507,0.0000454723  
 H,0,1.9455273302,-2.2739597454,-0.0000061856  
 H,0,3.6096455289,-0.3917870776,-0.0000086504  
 H,0,2.8375470971,1.9473508502,-0.0000019762  
 H,0,0.4343186928,2.5508413733,0.0000063022  
 H,0,-2.8587936319,-1.5355989051,0.0000262201  
 C,0,-2.6058891871,1.3392335115,-0.0000085907  
 H,0,-3.6578774318,1.0762131669,-0.000001142  
 H,0,-2.3644629413,2.3961504862,-0.0000181611  
 N,0,-0.7716060243,-1.7771473885,0.0000037098

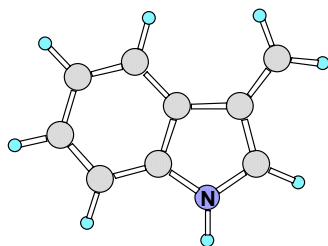

**16**

**16 in Fig. 3 and Supplementary Fig. 13.**

SCF Done: E(UB3LYP) = -402.592158224 Hartree  
 <S\*\*2>= 0.7712 S= 0.5105

|                                               |                             |
|-----------------------------------------------|-----------------------------|
| Zero-point correction =                       | 0.143185 (Hartree/Particle) |
| Thermal correction to Energy =                | 0.150980                    |
| Thermal correction to Enthalpy =              | 0.151924                    |
| Thermal correction to Gibbs Free Energy =     | 0.110620                    |
| Sum of electronic and zero-point Energies =   | -402.448973                 |
| Sum of electronic and thermal Energies =      | -402.441178                 |
| Sum of electronic and thermal Enthalpies =    | -402.440234                 |
| Sum of electronic and thermal Free Energies = | -402.481538                 |

|                              |              |       |
|------------------------------|--------------|-------|
| (Unpolarized solute)-Solvent | (kcal/mol) = | -6.53 |
| (Polarized solute)-Solvent   | (kcal/mol) = | -9.04 |
| Solute polarization          | (kcal/mol) = | 1.39  |
| Total electrostatic          | (kcal/mol) = | -7.65 |

|                         |              |        |
|-------------------------|--------------|--------|
| Cavitation energy       | (kcal/mol) = | 18.38  |
| Dispersion energy       | (kcal/mol) = | -19.98 |
| Repulsion energy        | (kcal/mol) = | 3.72   |
| Total non electrostatic | (kcal/mol) = | 2.12   |
| DeltaG (solv)           | (kcal/mol) = | -5.53  |

C,0,0.186206,-0.434721,-0.000029  
 C,0,-0.312138,0.888832,-0.0000000435  
 C,0,-1.678085,1.171583,0.000031  
 C,0,-2.556059,0.093467,0.000036  
 C,0,-2.082933,-1.229758,0.000008  
 C,0,-0.718664,-1.500041,-0.000024  
 C,0,1.648115,-0.36053,-0.000053  
 C,0,1.944736,1.012732,-0.00001  
 H,0,-2.04522,2.192053,0.000045  
 H,0,-3.624334,0.27784,0.000059  
 H,0,-2.79351,-2.0482,0.000011  
 H,0,-0.36388,-2.524671,-0.000045  
 H,0,2.906089,1.501347,0.000009  
 C,0,2.555,-1.420507,-0.000054  
 H,0,3.62281,-1.24328,0.000862  
 H,0,2.217214,-2.447978,-0.000128  
 N,0,0.776918,1.74524,-0.000032  
 H,0,0.725332,2.749875,-0.000016

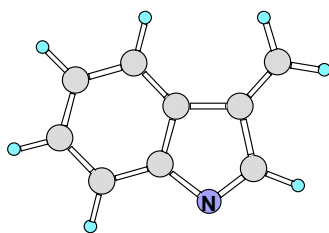

14

14 in Fig. 3 and Supplementary Fig. 13.

SCF Done: E(UB3LYP) = -401.995104928 Hartree  
 <S\*\*2>= 0.0000 S= 0.0000

|                                               |                             |
|-----------------------------------------------|-----------------------------|
| Zero-point correction =                       | 0.133245 (Hartree/Particle) |
| Thermal correction to Energy =                | 0.140435                    |
| Thermal correction to Enthalpy =              | 0.141379                    |
| Thermal correction to Gibbs Free Energy =     | 0.101563                    |
| Sum of electronic and zero-point Energies =   | -401.861860                 |
| Sum of electronic and thermal Energies =      | -401.854670                 |
| Sum of electronic and thermal Enthalpies =    | -401.853726                 |
| Sum of electronic and thermal Free Energies = | -401.893542                 |

|                              |              |        |
|------------------------------|--------------|--------|
| (Unpolarized solute)-Solvent | (kcal/mol) = | -5.16  |
| (Polarized solute)-Solvent   | (kcal/mol) = | -7.57  |
| Solute polarization          | (kcal/mol) = | 1.37   |
| Total electrostatic          | (kcal/mol) = | -6.20  |
| Cavitation energy            | (kcal/mol) = | 18.49  |
| Dispersion energy            | (kcal/mol) = | -18.87 |
| Repulsion energy             | (kcal/mol) = | 3.20   |
| Total non electrostatic      | (kcal/mol) = | 2.81   |
| DeltaG (solv)                | (kcal/mol) = | -3.39  |

C,0,-0.174614,0.446995,-0.000004  
 C,0,0.265303,-0.892644,-0.000006  
 C,0,1.614618,-1.210752,-0.000004  
 C,0,2.533747,-0.155798,0.000004  
 C,0,2.105747,1.174398,0.000009  
 C,0,0.742218,1.489321,0.000005  
 C,0,-1.643648,0.370741,-0.000015  
 C,0,-1.899921,-1.089007,0.000035  
 H,0,1.937048,-2.245075,-0.000009  
 H,0,3.59601,-0.372961,0.000007  
 H,0,2.839408,1.972375,0.000014  
 H,0,0.421144,2.525669,0.000007  
 H,0,-2.888571,-1.536945,0.000055  
 C,0,-2.573057,1.335468,-0.000009  
 H,0,-3.630068,1.093257,0.000065  
 H,0,-2.310193,2.387423,-0.000069  
 N,0,-0.826734,-1.805153,-0.000023

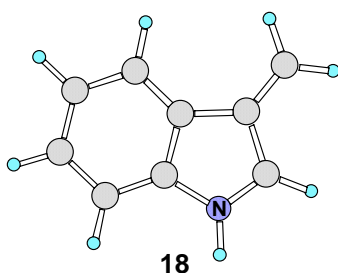

**18 in Fig. 3 and Supplementary Fig. 13.**

SCF Done: E(UB3LYP) = -402.367550234 Hartree  
 <S\*\*2>= 0.0000 S= 0.0000

|                                               |                             |
|-----------------------------------------------|-----------------------------|
| Zero-point correction=                        | 0.146993 (Hartree/Particle) |
| Thermal correction to Energy =                | 0.154287                    |
| Thermal correction to Enthalpy =              | 0.155231                    |
| Thermal correction to Gibbs Free Energy =     | 0.115256                    |
| Sum of electronic and zero-point Energies =   | -402.220557                 |
| Sum of electronic and thermal Energies =      | -402.213263                 |
| Sum of electronic and thermal Enthalpies =    | -402.212319                 |
| Sum of electronic and thermal Free Energies = | -402.252294                 |

|                              |              |        |
|------------------------------|--------------|--------|
| (Unpolarized solute)-Solvent | (kcal/mol) = | -50.83 |
| (Polarized solute)-Solvent   | (kcal/mol) = | -54.37 |
| Solute polarization          | (kcal/mol) = | 1.99   |
| Total electrostatic          | (kcal/mol) = | -52.38 |
| Cavitation energy            | (kcal/mol) = | 18.71  |
| Dispersion energy            | (kcal/mol) = | -19.29 |
| Repulsion energy             | (kcal/mol) = | 3.29   |
| Total non electrostatic      | (kcal/mol) = | 2.71   |
| DeltaG (solv)                | (kcal/mol) = | -49.66 |

C,0,0.1591436006,-0.4813672834,0.0001059319  
 C,0,-0.3195195572,0.8387994358,0.0000589008  
 C,0,-1.6633730425,1.1724448575,-0.0000028316  
 C,0,-2.5631675737,0.1048880171,-0.0000777937  
 C,0,-2.1151759988,-1.2204994617,-0.000066955  
 C,0,-0.7528828942,-1.5308529587,0.0000219188  
 C,0,1.6281982831,-0.4023959147,0.000392235  
 C,0,1.9343571454,1.0159562473,-0.0000991914  
 H,0,-2.0069107426,2.1997647415,-0.0000091404  
 H,0,-3.6265972853,0.3089480873,-0.0001339042  
 H,0,-2.8414096549,-2.0238971494,-0.0000966938  
 H,0,-0.4278491238,-2.5641753999,0.000082268  
 H,0,2.9034886391,1.4954701332,-0.0001980704  
 C,0,2.5754784595,-1.3634713879,0.0006287788  
 H,0,3.6305946093,-1.1145578749,-0.0001145629  
 H,0,2.3183161504,-2.416421025,-0.0001179066  
 N,0,0.8137896703,1.6953660022,0.0001321287  
 H,0,0.7611163153,2.7092839337,0.0001648444

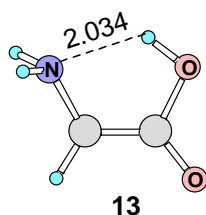

**13 in Fig. 3 and Supplementary Fig. 13.**

SCF Done: E(UB3LYP) = -283.929206602 Hartree  
 <S\*\*2>= 0.0000 S= 0.0000

|                                               |                             |
|-----------------------------------------------|-----------------------------|
| Zero-point correction =                       | 0.065228 (Hartree/Particle) |
| Thermal correction to Energy =                | 0.070478                    |
| Thermal correction to Enthalpy =              | 0.071422                    |
| Thermal correction to Gibbs Free Energy =     | 0.037162                    |
| Sum of electronic and zero-point Energies =   | -283.863978                 |
| Sum of electronic and thermal Energies =      | -283.858729                 |
| Sum of electronic and thermal Enthalpies =    | -283.857785                 |
| Sum of electronic and thermal Free Energies = | -283.892045                 |

|                              |              |        |
|------------------------------|--------------|--------|
| (Unpolarized solute)-Solvent | (kcal/mol) = | -66.08 |
| (Polarized solute)-Solvent   | (kcal/mol) = | -76.06 |
| Solute polarization          | (kcal/mol) = | 5.58   |
| Total electrostatic          | (kcal/mol) = | -70.49 |

|                         |              |        |
|-------------------------|--------------|--------|
| Cavitation energy       | (kcal/mol) = | 10.62  |
| Dispersion energy       | (kcal/mol) = | -14.77 |
| Repulsion energy        | (kcal/mol) = | 5.11   |
| Total non electrostatic | (kcal/mol) = | 0.97   |
| DeltaG (solv)           | (kcal/mol) = | -69.52 |

C,0,-0.61947417,-0.6609999671,0.101735321  
 C,0,0.65790704,-0.1505760575,-0.1250431682  
 O,0,0.6986451047,1.254284907,-0.3511107847  
 O,0,1.7507733813,-0.7451608196,-0.1566530774  
 N,0,-1.7676258851,0.2346900284,0.0930945148  
 H,0,-2.4518728369,0.0193594645,-0.6285911807  
 H,0,-0.2357198954,1.5175472275,-0.2854875214  
 H,0,-0.7496481191,-1.7230982982,0.2846141841  
 H,0,-2.2662756196,0.272835515,0.9793057125

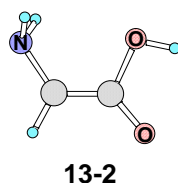

**13-2 in Supplementary Fig. 13.**

SCF Done: E(UB3LYP) = -283.929283042 Hartree  
 <S\*\*2>= 0.0000 S= 0.0000

|                                               |                             |
|-----------------------------------------------|-----------------------------|
| Zero-point correction =                       | 0.064752 (Hartree/Particle) |
| Thermal correction to Energy =                | 0.070417                    |
| Thermal correction to Enthalpy =              | 0.071361                    |
| Thermal correction to Gibbs Free Energy =     | 0.036248                    |
| Sum of electronic and zero-point Energies =   | -283.864532                 |
| Sum of electronic and thermal Energies =      | -283.858866                 |
| Sum of electronic and thermal Enthalpies =    | -283.857922                 |
| Sum of electronic and thermal Free Energies = | -283.893035                 |

|                              |              |        |
|------------------------------|--------------|--------|
| (Unpolarized solute)-Solvent | (kcal/mol) = | -64.88 |
| (Polarized solute)-Solvent   | (kcal/mol) = | -70.32 |
| Solute polarization          | (kcal/mol) = | 2.90   |
| Total electrostatic          | (kcal/mol) = | -67.42 |

|                         |              |        |
|-------------------------|--------------|--------|
| Cavitation energy       | (kcal/mol) = | 10.84  |
| Dispersion energy       | (kcal/mol) = | -14.10 |
| Repulsion energy        | (kcal/mol) = | 4.37   |
| Total non electrostatic | (kcal/mol) = | 1.11   |
| DeltaG (solv)           | (kcal/mol) = | -66.30 |

C,0,-0.7273886991,-0.7734306525,-0.1420939613  
 C,0,0.5034236212,-0.180283003,0.0191487639  
 O,0,0.4393674853,1.2397391341,0.2733128801  
 O,0,1.669364434,-0.654751606,-0.0154487447  
 N,0,-1.9971165261,-0.0670101486,-0.0698502868  
 H,0,-2.1009541667,0.3967493541,0.8298826485  
 H,0,1.3775392798,1.4503598061,0.3539659937  
 H,0,-0.7674093649,-1.8382644964,-0.3367653365  
 H,0,-2.0319850636,0.6829986122,-0.7565939569

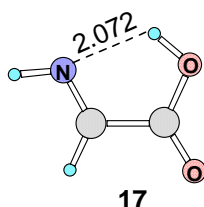

**17 in Fig. 3 and Supplementary Fig. 13.**

SCF Done: E(UB3LYP) = -283.298388254 Hartree  
 <S\*\*2>= 0.0000 S= 0.0000

|                                               |                             |
|-----------------------------------------------|-----------------------------|
| Zero-point correction =                       | 0.056175 (Hartree/Particle) |
| Thermal correction to Energy =                | 0.060868                    |
| Thermal correction to Enthalpy =              | 0.061812                    |
| Thermal correction to Gibbs Free Energy =     | 0.028539                    |
| Sum of electronic and zero-point Energies =   | -283.242214                 |
| Sum of electronic and thermal Energies =      | -283.237520                 |
| Sum of electronic and thermal Enthalpies =    | -283.236576                 |
| Sum of electronic and thermal Free Energies = | -283.269849                 |

|                              |              |        |
|------------------------------|--------------|--------|
| (Unpolarized solute)-Solvent | (kcal/mol) = | -9.86  |
| (Polarized solute)-Solvent   | (kcal/mol) = | -13.75 |
| Solute polarization          | (kcal/mol) = | 2.14   |
| Total electrostatic          | (kcal/mol) = | -11.61 |

|                         |              |        |
|-------------------------|--------------|--------|
| Cavitation energy       | (kcal/mol) = | 10.82  |
| Dispersion energy       | (kcal/mol) = | -12.19 |
| Repulsion energy        | (kcal/mol) = | 2.85   |
| Total non electrostatic | (kcal/mol) = | 1.48   |
| DeltaG (solv)           | (kcal/mol) = | -10.13 |

C,0,0.7989,-0.665506,0.000239  
 C,0,-0.59363,-0.070684,0.000058  
 O,0,-0.618359,1.267181,0.000012  
 O,0,-1.579805,-0.757751,-0.000126  
 N,0,1.788185,0.125294,-0.000158  
 H,0,2.689472,-0.353127,-0.000282  
 H,0,0.308135,1.574842,0.000311  
 H,0,0.838789,-1.757078,0.000205

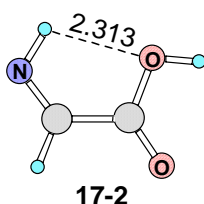

**17-2 in Supplementary Fig. 13.**

SCF Done: E(UB3LYP) = -283.296678340 Hartree  
 <S\*\*2>= 0.0000 S= 0.0000

|                                               |                             |
|-----------------------------------------------|-----------------------------|
| Zero-point correction =                       | 0.055981 (Hartree/Particle) |
| Thermal correction to Energy =                | 0.060877                    |
| Thermal correction to Enthalpy =              | 0.061822                    |
| Thermal correction to Gibbs Free Energy =     | 0.027993                    |
| Sum of electronic and zero-point Energies =   | -283.240698                 |
| Sum of electronic and thermal Energies =      | -283.235801                 |
| Sum of electronic and thermal Enthalpies =    | -283.234857                 |
| Sum of electronic and thermal Free Energies = | -283.268686                 |

|                              |              |        |
|------------------------------|--------------|--------|
| (Unpolarized solute)-Solvent | (kcal/mol) = | -10.48 |
| (Polarized solute)-Solvent   | (kcal/mol) = | -13.46 |
| Solute polarization          | (kcal/mol) = | 1.60   |
| Total electrostatic          | (kcal/mol) = | -11.85 |

|                         |              |        |
|-------------------------|--------------|--------|
| Cavitation energy       | (kcal/mol) = | 10.89  |
| Dispersion energy       | (kcal/mol) = | -12.17 |
| Repulsion energy        | (kcal/mol) = | 2.81   |
| Total non electrostatic | (kcal/mol) = | 1.53   |
| DeltaG (solv)           | (kcal/mol) = | -10.33 |

C,0,0.882783,-0.63262,-0.000032  
 C,0,-0.534449,-0.116816,-0.000053  
 O,0,-0.595865,1.232966,-0.000027  
 O,0,-1.501082,-0.834346,0.000033  
 N,0,1.937,0.067457,0.000046  
 H,0,1.711307,1.066527,-0.000023  
 H,0,-1.529977,1.489603,0.000186

H,0,0.945249,-1.72067,-0.00003

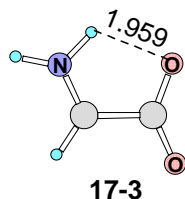

**17-3 in Supplementary Fig. 13.**

SCF Done: E(UB3LYP) = -283.270209265 Hartree  
<S\*\*2>= 0.0000 S= 0.0000

|                                               |                             |
|-----------------------------------------------|-----------------------------|
| Zero-point correction =                       | 0.054988 (Hartree/Particle) |
| Thermal correction to Energy =                | 0.059937                    |
| Thermal correction to Enthalpy =              | 0.060881                    |
| Thermal correction to Gibbs Free Energy =     | 0.026798                    |
| Sum of electronic and zero-point Energies =   | -283.215222                 |
| Sum of electronic and thermal Energies =      | -283.210272                 |
| Sum of electronic and thermal Enthalpies =    | -283.209328                 |
| Sum of electronic and thermal Free Energies = | -283.243411                 |

|                              |              |        |
|------------------------------|--------------|--------|
| (Unpolarized solute)-Solvent | (kcal/mol) = | -21.77 |
| (Polarized solute)-Solvent   | (kcal/mol) = | -33.31 |
| Solute polarization          | (kcal/mol) = | 6.33   |
| Total electrostatic          | (kcal/mol) = | -26.99 |
| -----                        |              |        |
| Cavitation energy            | (kcal/mol) = | 10.58  |
| Dispersion energy            | (kcal/mol) = | -12.36 |
| Repulsion energy             | (kcal/mol) = | 2.78   |
| Total non electrostatic      | (kcal/mol) = | 1.00   |
| DeltaG (solv)                | (kcal/mol) = | -25.99 |

C,0,-0.0699224293,0.0002080579,-0.0014375773  
C,0,0.0879571289,-0.0000168983,1.5630977977  
O,0,1.2908690686,-0.0004257088,1.8832011788  
O,0,-0.9874248062,0.0002655281,2.1608190562  
N,0,1.03532063,0.0003014472,-0.647031083  
H,0,1.1308634998,0.0002899257,-1.6563639899  
H,0,1.8460669643,0.000659978,0.0043667874  
H,0,-1.023442291,0.0001001438,-0.5235636245

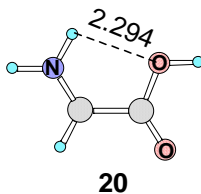

**20 in Fig. 3 and Supplementary Fig. 13.**

SCF Done: E(UB3LYP) = -283.629755457 Hartree  
<S\*\*2>= 0.0000 S= 0.0000

|                                               |                             |
|-----------------------------------------------|-----------------------------|
| Zero-point correction =                       | 0.069237 (Hartree/Particle) |
| Thermal correction to Energy =                | 0.074324                    |
| Thermal correction to Enthalpy =              | 0.075268                    |
| Thermal correction to Gibbs Free Energy =     | 0.040940                    |
| Sum of electronic and zero-point Energies =   | -283.560519                 |
| Sum of electronic and thermal Energies =      | -283.555431                 |
| Sum of electronic and thermal Enthalpies =    | -283.554487                 |
| Sum of electronic and thermal Free Energies = | -283.588816                 |

|                              |              |        |
|------------------------------|--------------|--------|
| (Unpolarized solute)-Solvent | (kcal/mol) = | -74.36 |
| (Polarized solute)-Solvent   | (kcal/mol) = | -79.48 |
| Solute polarization          | (kcal/mol) = | 2.80   |
| Total electrostatic          | (kcal/mol) = | -76.68 |
| Cavitation energy            | (kcal/mol) = | 10.95  |
| Dispersion energy            | (kcal/mol) = | -13.22 |
| Repulsion energy             | (kcal/mol) = | 3.28   |
| Total non electrostatic      | (kcal/mol) = | 1.01   |
| DeltaG (solv)                | (kcal/mol) = | -75.67 |

C,0,0.7713026157,-0.667171909,0.0001089839  
 C,0,-0.6325948577,-0.0946108073,0.0008524621  
 O,0,-0.5872009376,1.2363906451,-0.0001294157  
 O,0,-1.5774795223,-0.8219441009,0.000251664  
 N,0,1.8053278604,0.0826102062,-0.0000450742  
 H,0,2.7518999358,-0.2980908399,-0.0004529758  
 H,0,-1.4809352246,1.6225276352,-0.0006540354  
 H,0,0.8751875451,-1.7491576044,-0.0001796897  
 H,0,1.7024245852,1.1005157749,0.0002920809

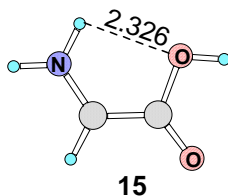

**15 in Fig. 3 and Supplementary Fig. 13.**

SCF Done: E(UB3LYP) = -283.895378775 Hartree  
 <S\*\*2>= 0.7554 S= 0.5027

|                                               |                             |
|-----------------------------------------------|-----------------------------|
| Zero-point correction =                       | 0.066234 (Hartree/Particle) |
| Thermal correction to Energy =                | 0.071868                    |
| Thermal correction to Enthalpy =              | 0.072812                    |
| Thermal correction to Gibbs Free Energy =     | 0.037308                    |
| Sum of electronic and zero-point Energies =   | -283.829145                 |
| Sum of electronic and thermal Energies =      | -283.823511                 |
| Sum of electronic and thermal Enthalpies =    | -283.822566                 |
| Sum of electronic and thermal Free Energies = | -283.858071                 |

|                              |              |        |
|------------------------------|--------------|--------|
| (Unpolarized solute)-Solvent | (kcal/mol) = | -12.12 |
| (Polarized solute)-Solvent   | (kcal/mol) = | -16.43 |
| Solute polarization          | (kcal/mol) = | 2.39   |

|                         |              |        |
|-------------------------|--------------|--------|
| Total electrostatic     | (kcal/mol) = | -14.04 |
| -----                   |              |        |
| Cavitation energy       | (kcal/mol) = | 11.06  |
| Dispersion energy       | (kcal/mol) = | -13.10 |
| Repulsion energy        | (kcal/mol) = | 3.14   |
| Total non electrostatic | (kcal/mol) = | 1.10   |
| DeltaG (solv)           | (kcal/mol) = | -12.94 |
| -----                   |              |        |

C,0,0.7253807399,-0.6946438526,-0.0369242383  
 C,0,-0.5843975941,-0.1331801348,-0.0052180262  
 O,0,-0.563157891,1.2485698565,-0.0213830105  
 O,0,-1.6336236349,-0.7591154517,0.0365984426  
 N,0,1.8442911551,0.0766776216,-0.1190652588  
 H,0,2.7564842915,-0.3275449841,0.0079852683  
 H,0,-1.4855061092,1.5364082682,0.0061135344  
 H,0,0.8319277909,-1.7684123543,-0.0301466548  
 H,0,1.7561742518,1.0780160311,-0.0378930567

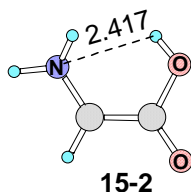

**15-2 in Supplementary Fig. 13.**

SCF Done: E(UB3LYP) = -283.879968691 Hartree  
 <S\*\*2>= 0.7568 S= 0.5034

|                                               |                             |
|-----------------------------------------------|-----------------------------|
| Zero-point correction=                        | 0.066103 (Hartree/Particle) |
| Thermal correction to Energy =                | 0.071601                    |
| Thermal correction to Enthalpy =              | 0.072546                    |
| Thermal correction to Gibbs Free Energy =     | 0.037269                    |
| Sum of electronic and zero-point Energies =   | -283.813866                 |
| Sum of electronic and thermal Energies =      | -283.808367                 |
| Sum of electronic and thermal Enthalpies =    | -283.807423                 |
| Sum of electronic and thermal Free Energies = | -283.842700                 |
| -----                                         |                             |

|                              |              |        |
|------------------------------|--------------|--------|
| (Unpolarized solute)-Solvent | (kcal/mol) = | -14.47 |
| (Polarized solute)-Solvent   | (kcal/mol) = | -22.45 |
| Solute polarization          | (kcal/mol) = | 4.54   |
| Total electrostatic          | (kcal/mol) = | -17.91 |
| -----                        |              |        |

|                         |              |        |
|-------------------------|--------------|--------|
| Cavitation energy       | (kcal/mol) = | 11.15  |
| Dispersion energy       | (kcal/mol) = | -12.97 |
| Repulsion energy        | (kcal/mol) = | 3.04   |
| Total non electrostatic | (kcal/mol) = | 1.21   |
| DeltaG (solv)           | (kcal/mol) = | -16.70 |
| -----                   |              |        |

C,0,-0.1044829528,-0.2690923585,-0.0735115014  
 C,0,0.0277922105,0.1969459729,1.2794772532  
 O,0,1.2983836286,0.5640851431,1.6849026184  
 O,0,-0.9065891494,0.3187049014,2.0450943569  
 N,0,0.9239106209,-0.2150221921,-0.9882578094  
 H,0,1.5605267258,0.5705589166,-0.9446792865

H,0,-1.0306855725,-0.7418655169,-0.3652819984  
H,0,1.9614365399,0.0821504612,1.1742336754  
H,0,0.715045475,-0.5053437021,-1.9316187049

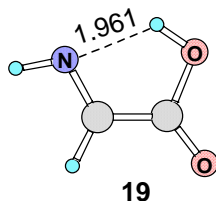

**19 in Fig. 3 and Supplementary Fig. 13.**

SCF Done: E(UB3LYP) = -283.326424084 Hartree  
<S\*\*2>= 0.7553 S= 0.5027

|                                               |                             |
|-----------------------------------------------|-----------------------------|
| Zero-point correction =                       | 0.053218 (Hartree/Particle) |
| Thermal correction to Energy =                | 0.058037                    |
| Thermal correction to Enthalpy =              | 0.058981                    |
| Thermal correction to Gibbs Free Energy =     | 0.025017                    |
| Sum of electronic and zero-point Energies =   | -283.273206                 |
| Sum of electronic and thermal Energies =      | -283.268387                 |
| Sum of electronic and thermal Enthalpies =    | -283.267443                 |
| Sum of electronic and thermal Free Energies = | -283.301407                 |

|                              |              |         |
|------------------------------|--------------|---------|
| (Unpolarized solute)-Solvent | (kcal/mol) = | -112.81 |
| (Polarized solute)-Solvent   | (kcal/mol) = | -150.69 |
| Solute polarization          | (kcal/mol) = | 21.33   |
| Total electrostatic          | (kcal/mol) = | -129.36 |
| Cavitation energy            | (kcal/mol) = | 10.16   |
| Dispersion energy            | (kcal/mol) = | -14.65  |
| Repulsion energy             | (kcal/mol) = | 9.20    |
| Total non electrostatic      | (kcal/mol) = | 4.71    |
| DeltaG (solv)                | (kcal/mol) = | -124.65 |

C,0,0.7525559158,-0.6560878622,0.0001711383  
C,0,-0.5715494695,-0.1247394601,0.0000344543  
O,0,-0.5946585061,1.2685846529,0.0001276825  
O,0,-1.6468327765,-0.7452811438,-0.0003199163  
N,0,1.811128161,0.1907856968,-0.0003653039  
H,0,2.6847723034,-0.3311527416,-0.0003369993  
H,0,0.3561339169,1.5050993368,0.0004342736  
H,0,0.840137455,-1.7440374789,0.0005136707

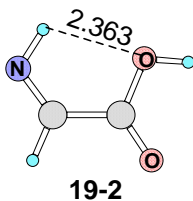

**19-2 in Supplementary Fig. 13.**

SCF Done: E(UB3LYP) = -283.321432627 Hartree

<S\*\*2>= 0.7572 S= 0.5036

|                                               |                             |
|-----------------------------------------------|-----------------------------|
| Zero-point correction =                       | 0.053149 (Hartree/Particle) |
| Thermal correction to Energy =                | 0.058177                    |
| Thermal correction to Enthalpy =              | 0.059121                    |
| Thermal correction to Gibbs Free Energy =     | 0.024708                    |
| Sum of electronic and zero-point Energies =   | -283.268284                 |
| Sum of electronic and thermal Energies =      | -283.263255                 |
| Sum of electronic and thermal Enthalpies =    | -283.262311                 |
| Sum of electronic and thermal Free Energies = | -283.296725                 |

|                              |              |         |
|------------------------------|--------------|---------|
| (Unpolarized solute)-Solvent | (kcal/mol) = | -103.16 |
| (Polarized solute)-Solvent   | (kcal/mol) = | -131.19 |
| Solute polarization          | (kcal/mol) = | 15.64   |
| Total electrostatic          | (kcal/mol) = | -115.55 |
| Cavitation energy            | (kcal/mol) = | 10.19   |
| Dispersion energy            | (kcal/mol) = | -14.12  |
| Repulsion energy             | (kcal/mol) = | 6.89    |
| Total non electrostatic      | (kcal/mol) = | 2.96    |
| DeltaG (solv)                | (kcal/mol) = | -112.60 |

C,0,0.8466033817,-0.6203034678,-0.0000073777  
 C,0,-0.4853554425,-0.1435112317,-0.0000144757  
 O,0,-0.6000718894,1.2733862532,0.0001072424  
 O,0,-1.5584565743,-0.7962874897,-0.0000505283  
 N,0,1.9939002317,0.0762785785,-0.0000252531  
 H,0,1.7543285755,1.0701009599,-0.0000568726  
 H,0,-1.5561283404,1.401016654,0.0001214538  
 H,0,0.9201460576,-1.7085792564,0.0000258112

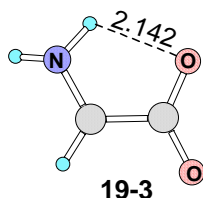

**19-3 in Supplementary Fig. 13.**

SCF Done: E(UB3LYP) = -283.328321210 Hartree  
 <S\*\*2>= 0.7547 S= 0.5024

|                                               |                             |
|-----------------------------------------------|-----------------------------|
| Zero-point correction =                       | 0.052964 (Hartree/Particle) |
| Thermal correction to Energy =                | 0.058066                    |
| Thermal correction to Enthalpy =              | 0.059011                    |
| Thermal correction to Gibbs Free Energy =     | 0.024404                    |
| Sum of electronic and zero-point Energies =   | -283.275357                 |
| Sum of electronic and thermal Energies =      | -283.270255                 |
| Sum of electronic and thermal Enthalpies =    | -283.269311                 |
| Sum of electronic and thermal Free Energies = | -283.303917                 |

|                              |              |        |
|------------------------------|--------------|--------|
| (Unpolarized solute)-Solvent | (kcal/mol) = | -70.90 |
| (Polarized solute)-Solvent   | (kcal/mol) = | -83.44 |
| Solute polarization          | (kcal/mol) = | 7.00   |
| Total electrostatic          | (kcal/mol) = | -76.43 |

|                         |              |        |
|-------------------------|--------------|--------|
| Cavitation energy       | (kcal/mol) = | 10.15  |
| Dispersion energy       | (kcal/mol) = | -13.70 |
| Repulsion energy        | (kcal/mol) = | 4.11   |
| Total non electrostatic | (kcal/mol) = | 0.55   |
| DeltaG (solv)           | (kcal/mol) = | -75.88 |

C,0,0.6535101562,-0.7269551074,-0.0822028045  
 C,0,-0.6178524639,0.0386750088,0.0184378894  
 O,0,-0.4799448675,1.3032981995,0.0330885988  
 O,0,-1.6833701433,-0.632359496,0.0910624685  
 N,0,1.8399077817,-0.0159352668,-0.2762782721  
 H,0,2.6523283712,-0.3428413035,0.2356028659  
 H,0,1.6305662679,0.9712935049,-0.1171995321  
 H,0,0.6864618977,-1.8103645395,-0.1012862139

### 1.8. *In vitro* Susceptibility Testing

**Bioassays of NOS and 5'-fluoro-NOS (27) against *B. subtilis*.** 0.1 µg, 0.2 µg, 0.4 µg or 0.8 µg of each compound in 100 µl of THF was added to stainless steel cylinders on Antibiotic Medium 2 (purchased from SCAS EcoScience Technology Inc., China) agar plates that were pre-seeded with an overnight culture of the test strain at a concentration of 1% (vol/vol). The plates were incubated at 37°C for 20-24 hrs, and the biological activity was estimated by measuring the sizes of the inhibition zones. All assays were carried out in triplicate.

**Minimum Inhibitory Concentrations (MICs) of NOS and 5'-fluoro-NOS (27).** The MICs were measured by broth dilution similar to the method described previously<sup>15</sup>. Each test compound was dissolved in THF to produce a stock solution (10 µg/ml), which was serially diluted into 50 µl Mueller-Hinton broth (Qingdao Hope Bio-Technology Co. Ltd., China) in a 96-well microtiter plate to a final concentration ranging from 0.0256 to 0 µg/ml. 50 µl of the test strain ( $10^7$ - $10^8$  cfu/ml, calculated according to the 0.5 McFarland standard<sup>16</sup>) was then added into each well of the microtiter plate. After incubation at 37°C for 18-24 hr, The MIC was determined to be the lowest concentration of compound that inhibited visible bacterial growth. All testings were carried out in duplicate.

## 2. Supplemental Results

### 2.1 Supplementary Figures

**Supplementary Figure 1.** Time course analysis of MIA production in the *nosL*-expressing strain SL4101.

Without the supplementation (a, control), and with the supplementation of Gly (b), L-Ser (c), and L-Trp (d), respectively. Data represent mean values  $\pm$  s.d.

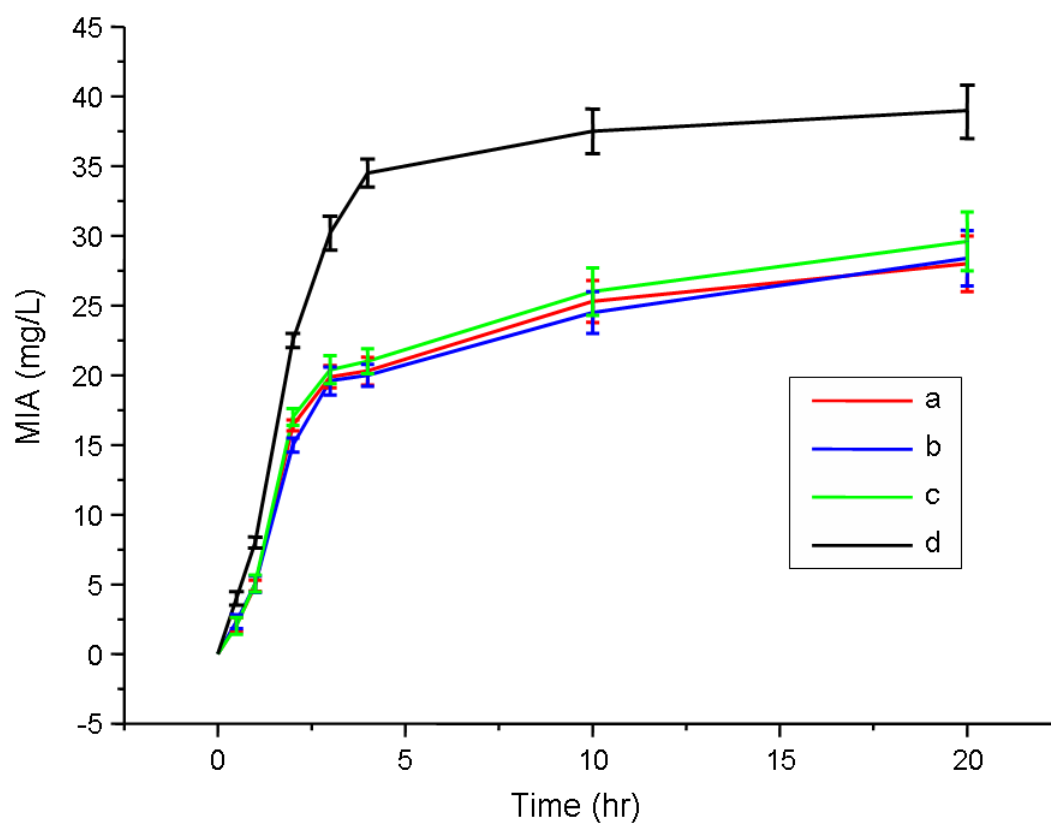

**Supplementary Figure 2.** Multiple sequence alignment of selected radical S-AdoMet proteins, including

NosL from *S. actuosus* (ACR48341), ThiHs from *Salmonella enterica* (AAD48429) and *E. coli* (AAB95619), BioB from *E. coli* (CAQ31276), PflA from *E. coli* (CAQ31430) and KamA from *Thermoanaerobacter tengcongensis* (AAM23985). For site-specific mutations, the conserved motif CxxxCxxC for [4Fe-4S] nucleating and the G residue in the S-AdoMet binding site are boxed. NosL shares around 20% sequence identity to various ThiHs, but no significant homology to others in overall sequence.

```

NosL_S.actuosus -MTQNSQAMTSBAMTGDVFLPELEDVRAEAATVDTRAVALAEGEPAESRAVALALWE
ThiB_S.enterica -----MRTFTDRWROLEWDDIRLR--INGRTAADVERALNAABLSRDIMALLS
ThiB_E.coli -----MRTFSDRWROLDWDDIRLR--INGRTAADVERALNASQITRDMMALLS
BioB_E.coli -----MAHRPRWTLSQVTELFERPLLDLLFEAQ
PflA_E.coli -----MSVIGRIRTS
KamA_T.tengcong MRVNRRLBELFGHVPSDIWYNWRWQIANRIETVEELRKYLP LSEEEHEAISKALQQLRMAI
consensus -----t--w-q-ewedvr-----v-k--l--g-e-a----dlal-#

NosL_S.actuosus DRSIGTAELQAAAEARCGARRP--RLBTFFVP-----L
ThiB_S.enterica PAAADYLEPIAQAQRLTRQRFNGTVSFFYP-----L
ThiB_E.coli PAASGYLEQLAQAQRLTRQRFNGTVSFFYP-----L
BioB_E.coli QVHRQHFDPQGVQVSTLS-----F
PflA_E.coli FESCCTVDGPGIR-----FIT-----F
KamA_T.tengcong TPYYLSLIDPMDPNPDIRRAVPTIHELQAPEDLVDPDYEDVDSFPVPGITHRYPDRLM
consensus ---gtle--a-r--rl-r-r--l--yvp-----l

NosL_S.actuosus YTMNYCDSECRMC SMRRGMRLDRKFPSGRKEITEQLEILYHBEGVRCVGFLLIGEYEDRET
ThiB_S.enterica YLSMLCANDCTYCGFSMSM-RIRKRTLDEVDIQRECFAIR-RLGFEHLLLVIGEBQARVG
ThiB_E.coli YLSMLCANDCTYCGFSMSM-RIRKRTLDEADIARESAATR-EMGFEHLLLVIGEBQARVG
BioB_E.coli IRTGACPEDCRYCPQS-SRYKRTGLEAERIMEVEQVLESARKARAGSTRFCGAAWKNPH
PflA_E.coli FQG-CLMRCLYCHNRDITMDTBGGKEVTVEDLMKEVVTYR-----HFMNASGGGVASG
KamA_T.tengcong LVTDCSMYCRBCERRRFAGETDAP-MPMDRLERQIEYIKNTPOQRDVLISGQPLTLSD
consensus yltr-C--dCkyC---sn-rl-rk-l-l-di-rele-ir--g--hvlilltGf--k-g

NosL_S.actuosus RLASAFRIGWAIRTAIDLGFERYVFNIGSMEQDEIDVLGEMIGREDPVYTMCFQESYDRE
ThiB_S.enterica --MDYFRR--HLPTIRQFSSLOMEVQPLSQENYAEI-KTLGIDG--VMVYQETYBEA
ThiB_E.coli --MDYFRR--HLPALREQFSSLOMEVQPLAETAYAEI-KQLGIDG--VMVYQETYBEA
BioB_E.coli -----ERDMPYLEQMVQGVKAMGLEACMTLGLTSESQAQRLANAG-----LDYNNEN
PflA_E.coli -----GEAILQAEFFVRDMFRACKREG-----HTCLDTNG-----FVRRYDPV
KamA_T.tengcong S-----RLEEILRLREIPHYEIRIGSSVPVVLPMRITPPELVN-----MLRRYHPI
consensus -----frr--l--lr--f--v-mei-m--t--l--lg-eg--m-vfqe-yh--

NosL_S.actuosus TYRRFMGKTSVGVPKADFDRRVVVSPDRWLDAGYRYVNPGLVG-LHDDLSAEI LVS LVAHG
ThiB_S.enterica TYAQHHLEG-----RRQDFPWRLETPDRLGRAGIDRI GLGALIG-LSDNMRVDCYMVAEHI
ThiB_E.coli TYARHHLEG-----RRQDFPWRLETPDRLGRAGIDRI GLGALIG-LSDNMRVDCYMVAEHI
BioB_E.coli LDTSPFYG-NIITRTYQERLDTLRRVDRAGIRVCSSGIVG--LGETVDRAGILLQLA
PflA_E.coli IDELLEVT-----LVMILDLRQ-MNDEIHQNLVGVSWER
KamA_T.tengcong WLNTDFNHP-----HEITEDSRKACMLADAGIPLGNQTVLLRGVMDCEVVMKRIHREIV
consensus iy--h-lkg-----k-df--rlet-drlgdagi--v-lgvlvg-l-d-lrve--mv-ehl

NosL_S.actuosus DBLRSR--GATADLSVPRMRFAMKSRDTTRVGD-DYTLRLMSVVAFTCPEQRILVLTREP
ThiB_S.enterica LWMQKHYSQSRYSVSFPPIRLPCTGGVEPASVMDERQLVQTCAPRLLAPETELSLSTRES
ThiB_E.coli LMLQKHYSQSRYSVSFPPIRLPCTGGIEPASIMDERQLVQTCAPRLLAPETELSLSTRES
BioB_E.coli NLPPTPESVFINMLVRVGTPLADMD-----VDAFDFTIATAVARIMMPTSYVRLSAGRE
PflA_E.coli TLEFARYLANRNVVRVIRYVVVP-----WSDDDSAHRLGEFTRDMGNVRIELLPYB
KamA_T.tengcong RLRVRPYIYQCDLSPGLSHFRTPVSRGIEIEG--LRGHTSGYCVPTFPVVDAPGGGXRI
consensus -ll--yw--r--l-fprmrp-tg--d--vadd-dll-ti-afill-peiel-ltre-

NosL_S.actuosus QEFQDVALGLAGVISPGSPDVAPYRAGCEARNTERSSQFLVADLRPRHILGRIEASGTP
ThiB_S.enterica PWFEDRVIPLA--INNVSASFSTQPGGYADNBEPELEQFSPEDARRPETVASALSAQGLQ
ThiB_E.coli PWFEDRVIPLA--INNVSASFSTQPGGYADNBEPELEQFSPEDARRPETVASALSAQGLQ
BioB_E.coli QMNEQTQAMCFMAGANSIPYGCRLTTPNBEEDRLQLFRKLGILNPQQTAVLAGDNEQQQ
PflA_E.coli ELGRKRWVANG-----BEYKLDGVRPPEKRETMERVRGILIQYGRK
KamA_T.tengcong PVGPNYVISQSHDRILVRMYEGVIVTYVEPRDYTPGPCVCDEEVPKSEGVAGLMQDRTIG
consensus pmfrd-vi-la--in-v--k--g--add-eleqf-p-dlrrpe-vagalea-glq

NosL_S.actuosus --VDHFNVPAGEASRAV--
ThiB_S.enterica PVWRDMDSWLGRASQTR--
ThiB_E.coli PVWRDMDSWLGRASQRL--
BioB_E.coli RLEQALMTPDPTDEYYNAAAL
PflA_E.coli VMF
KamA_T.tengcong VLEPENLERKKRRRDER--
consensus -vw-dfv--gras-----

```

**Supplementary Figure 3.** HPLC analysis of MIA production in the recombinant *E. coli* strains. SL4101 for expressing NosL (I), SL4103 for expressing the C95A mutant NosL (II), SL4105 for expressing the C99A mutant NosL (III), SL4107 for expressing the C102A mutant NosL (IV), and SL4109 for expressing the G142A mutant NosL (V).

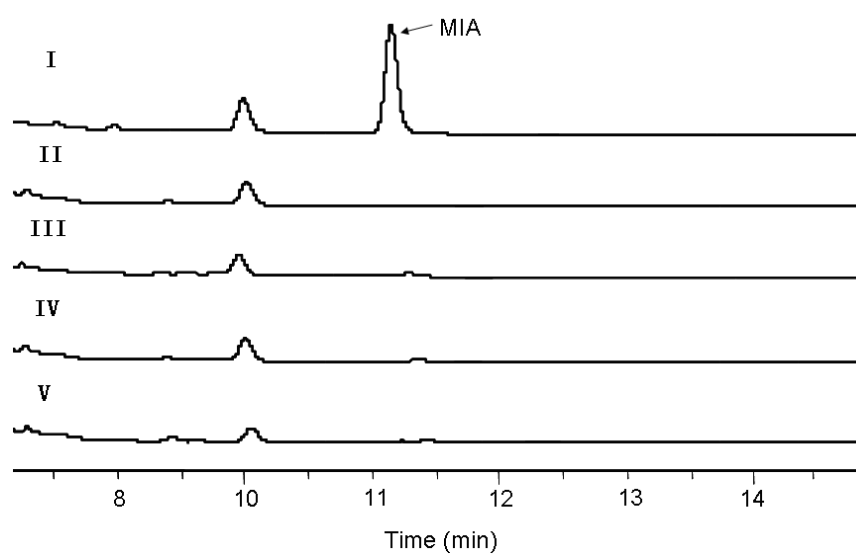

**Supplementary Figure 4.** Quantitative analysis of NosL-catalyzed *in vitro* conversion. (a) Dependence of enzyme concentration. The reactions are catalyzed by 20  $\mu$ M aerobically purified NosL (Sample 1), 20  $\mu$ M anaerobically purified NosL (without reconstitution, Sample 2), and 10  $\mu$ M (Sample 3), 20  $\mu$ M (Sample 4), 40  $\mu$ M (Sample 5), or 80  $\mu$ M reconstituted NosL (Sample 6), respectively, in the presence of *S*-AdoMet, L-trp and dithionite. Samples 7, 8 and 9 served as the controls, by respectively omitting NosL, *S*-AdoMet, and L-trp from Sample 4. (b) Time course of NosL-catalyzed *in vitro* conversion for detecting the production of MIA, 3-methylindole, and AdoH. The reaction mixture contains reconstituted NosL (20  $\mu$ M), L-trp (500  $\mu$ M), *S*-AdoMet (1 mM) and sodium dithionite (1 mM). (c) Effect of dithionite concentration on the production of MIA and 3-methylindole. Each 100  $\mu$ M of reaction mixture, containing 20  $\mu$ M reconstituted NosL, 10 mM dithiothreitol, 1 mM *S*-AdoMet, 500  $\mu$ M L-Trp, and dithionite varying in concentration in 50 mM Tris-HCl buffer (pH 8.0), was carried out at 25°C for 2 hr before product examination. Samples 1-6 show the concentration of dithionite at 100  $\mu$ M (1), 200  $\mu$ M (2), 500  $\mu$ M (3), 1 mM (4), 2 mM (5), and 4 mM (6), respectively. Data represent mean values  $\pm$  s.d.

**a**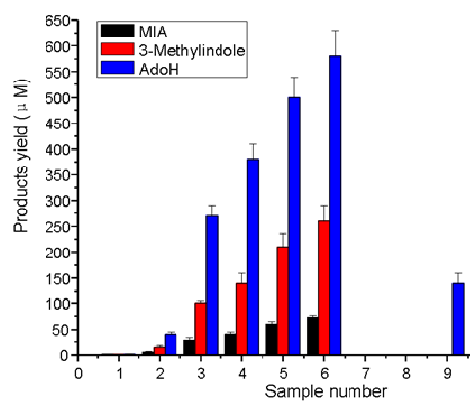**b**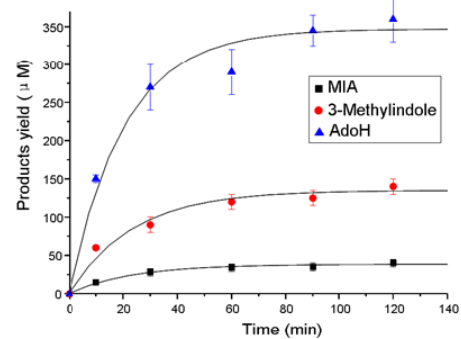**c**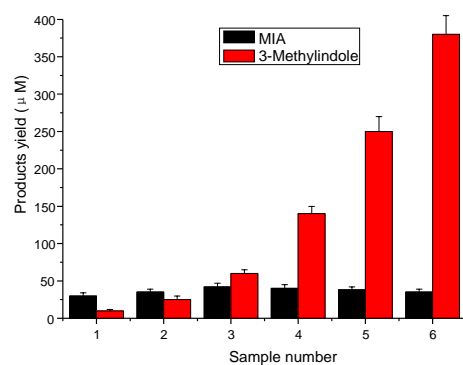

**Supplementary Figure 5.** Characterization of the reconstituted NosL. (a) NosL (48.4 kDa) on the 12% SDS-PAGE gel. (b) UV-Vis absorptions of the reconstituted protein (bold line) and the protein reduced by sodium dithionite (thin line). (c) EPR spectrum of reconstituted NosL reduced by sodium dithionite. The values were recorded under the following conditions: temperature, 13 K; modulation amplitude, 5 G; microwave power, 1.0 mW; and microwave frequency, 9.4 GHz.

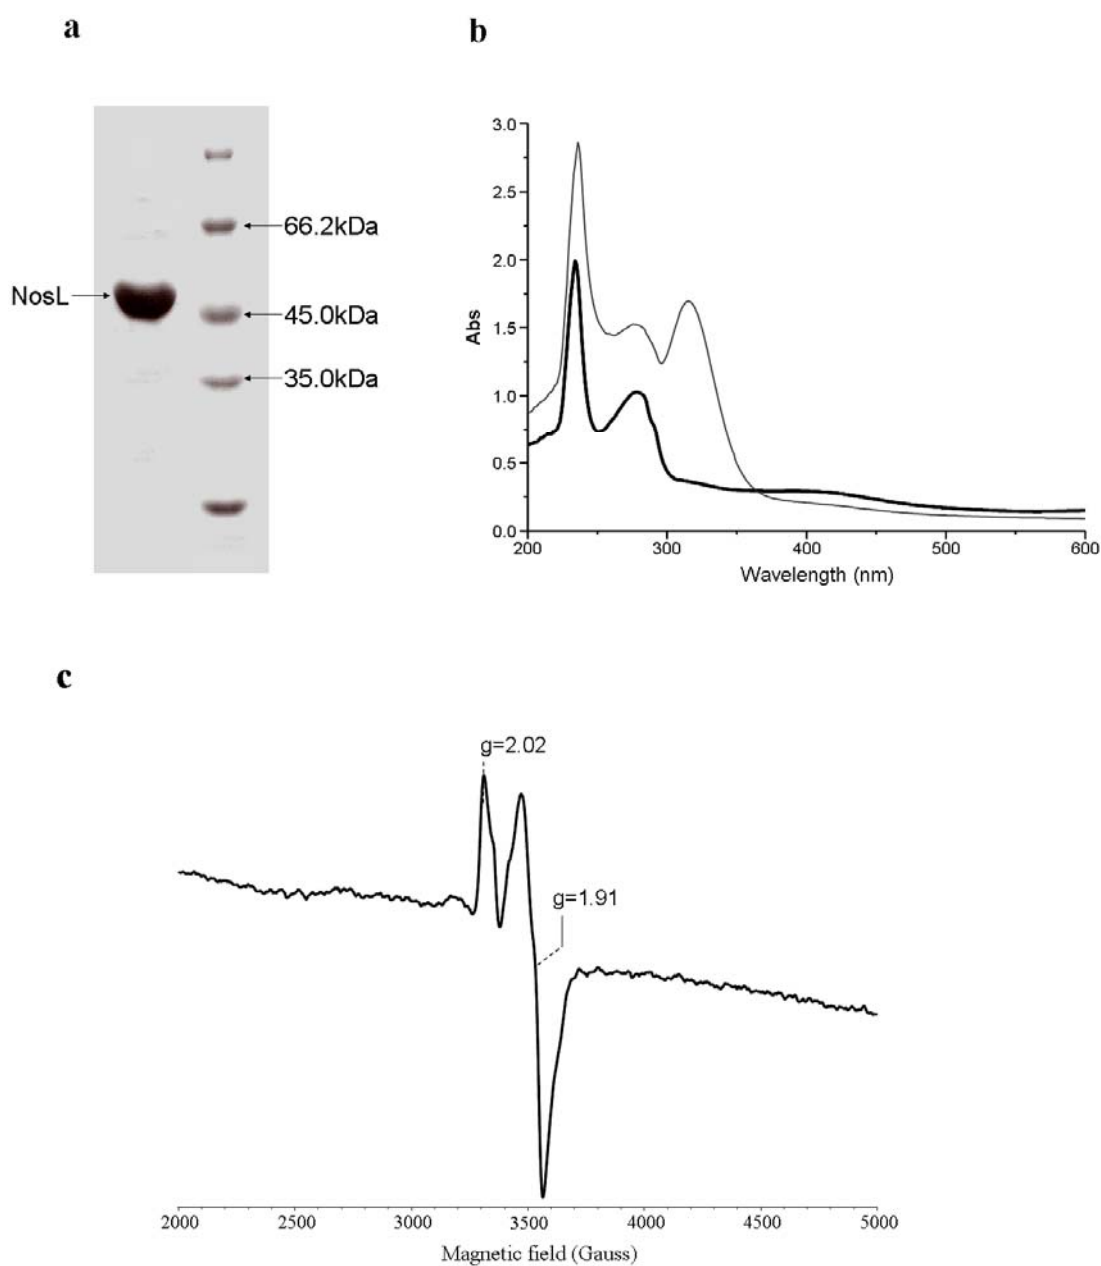

**Supplementary Figure 6.** NosL-catalyzed MIA production *in vitro*. I, in the presence of the chemical reductant dithionite; and II, in the presence of the natural reduction system (flavodoxin, flavodoxin reductase, and NADPH).

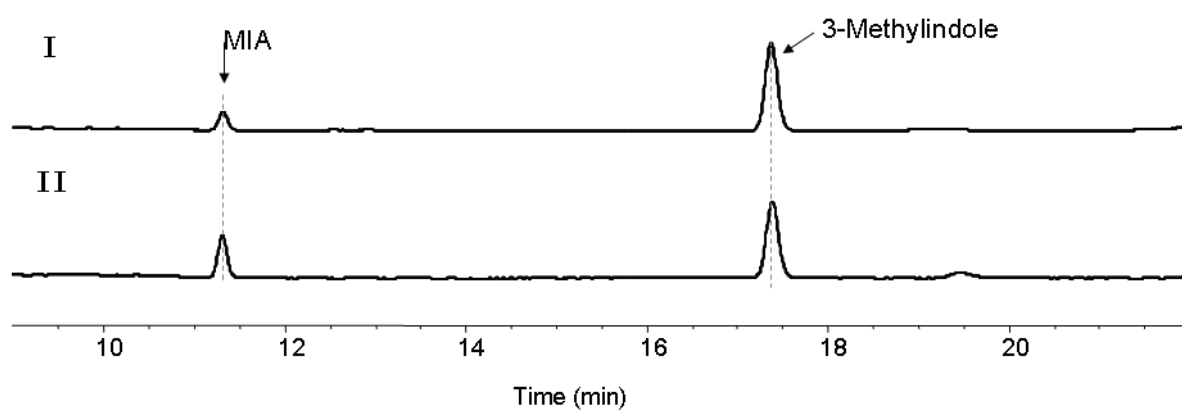

**Supplementary Figure 7.**  $^{13}\text{C}$  NMR spectra (100MHz,  $\text{d}_6\text{-DMSO}$ ) of labeled MIAs. (a)

[carboxyl- $^{13}\text{C}$ ]MIA (3), (b). [methyl- $^{13}\text{C}$ ]MIA (4).

**a**

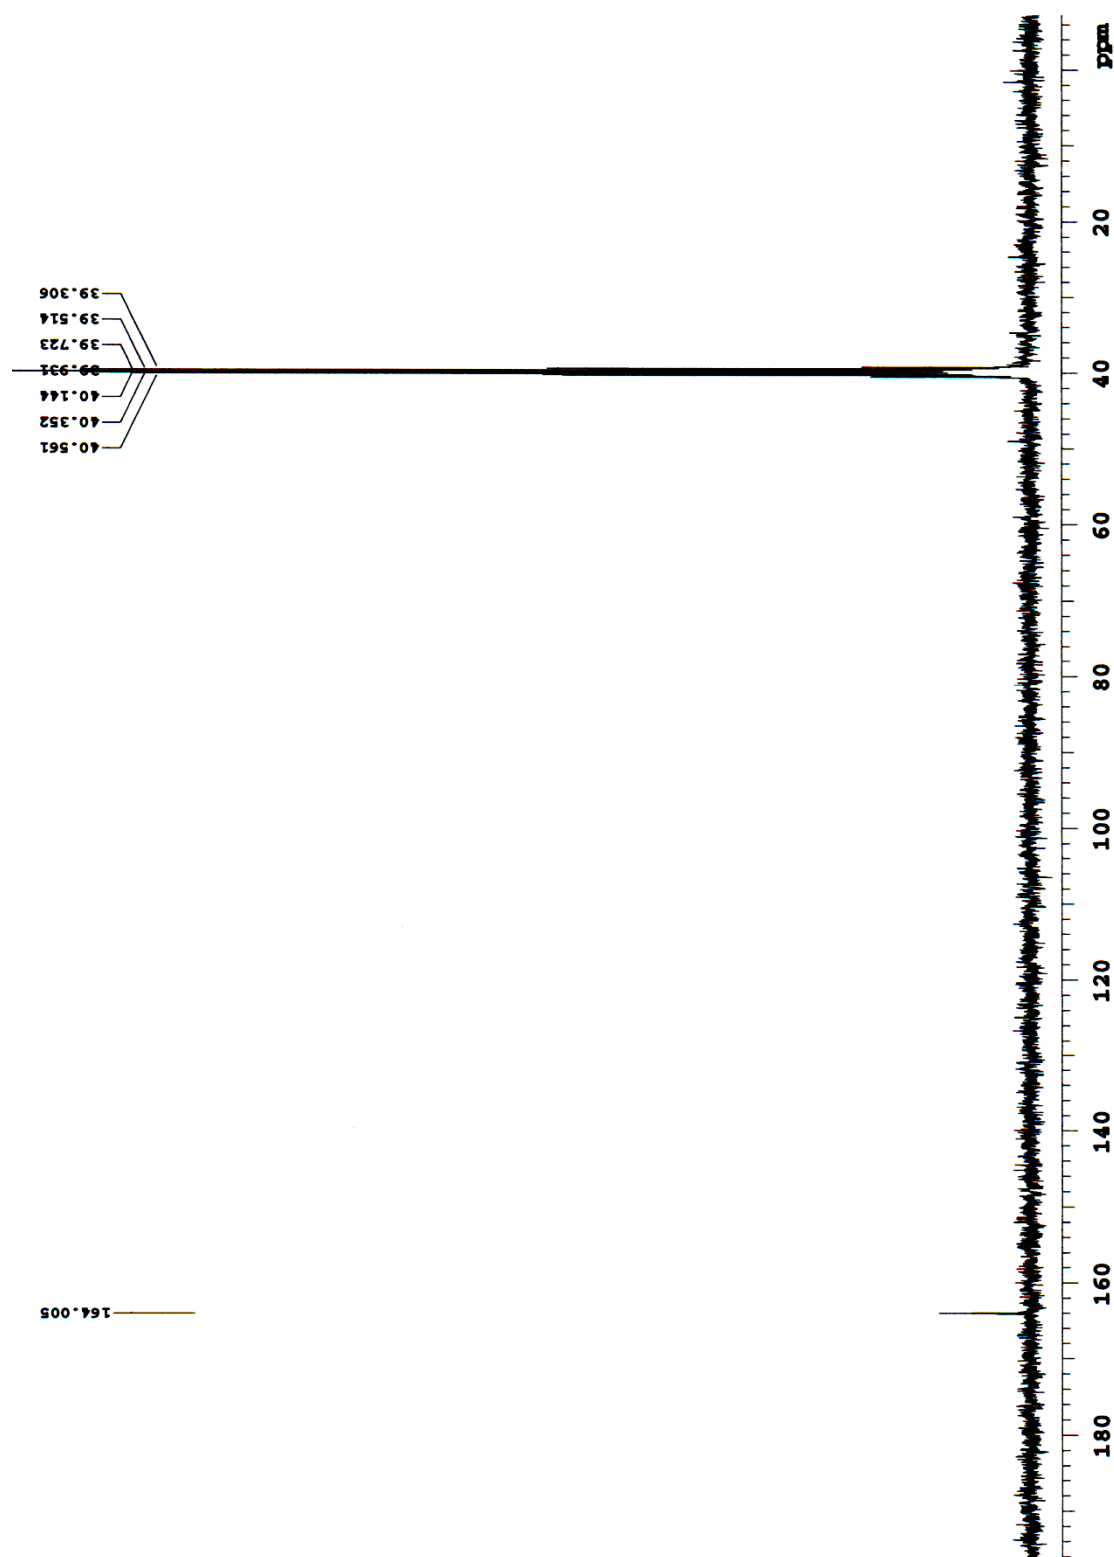

b

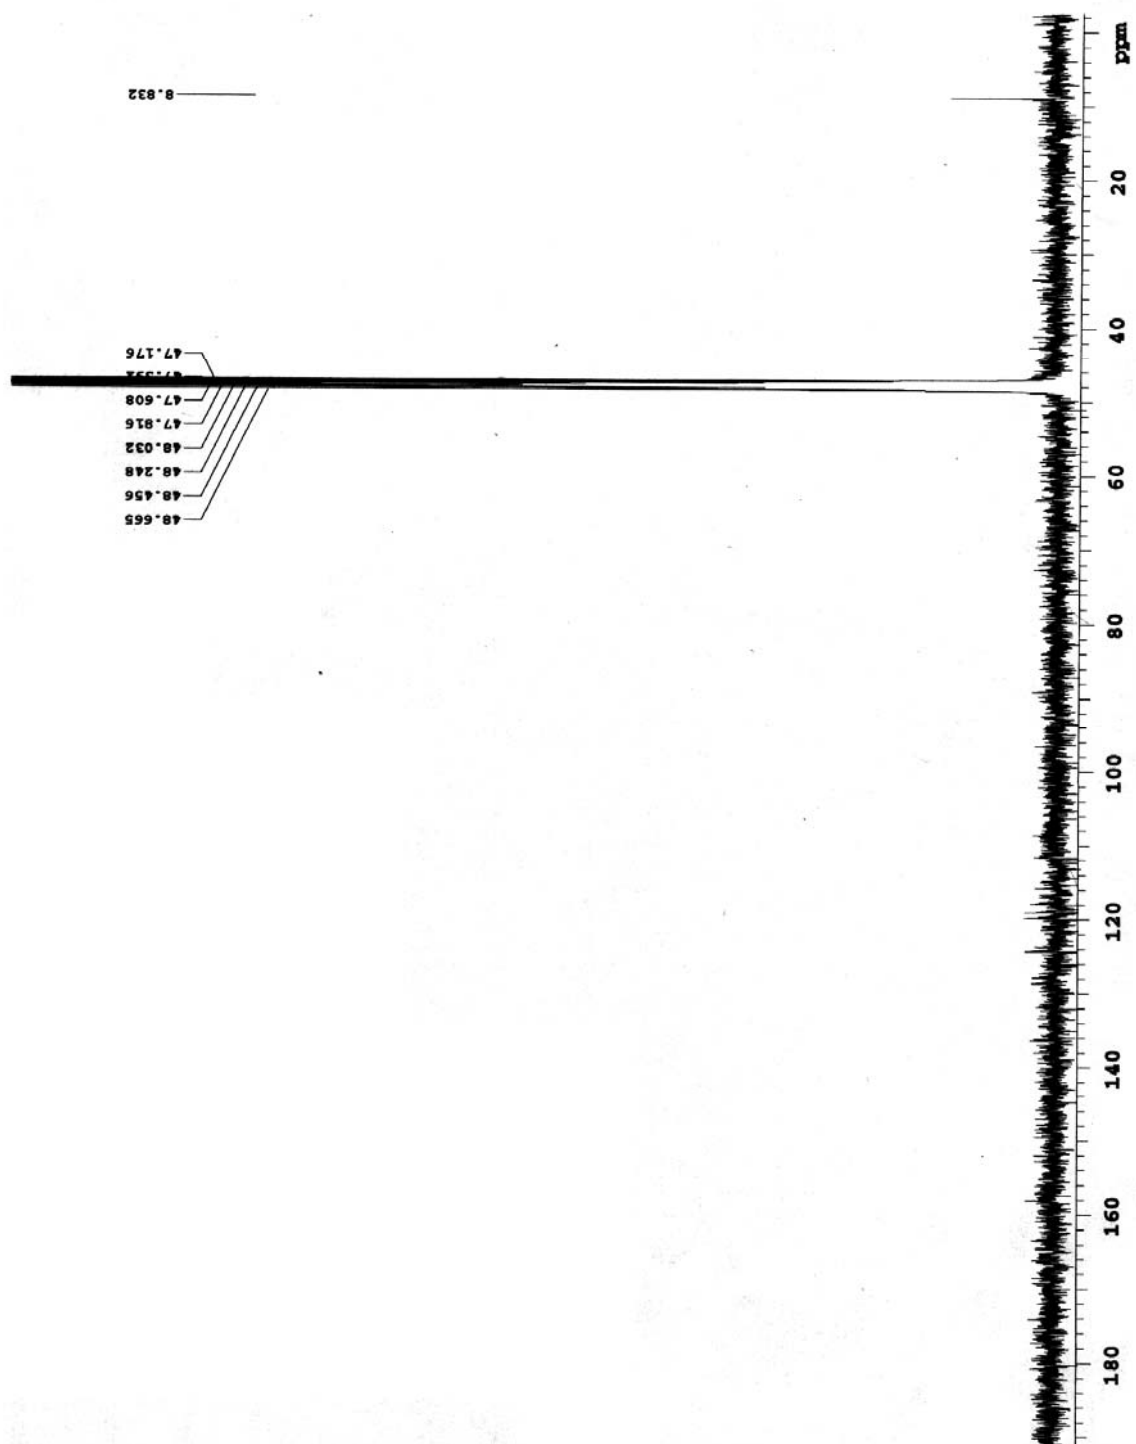

**Supplementary Figure 8.** Partial  $^1\text{H}$  NMR spectrum (500MHz,  $\text{CD}_3\text{OD}$ ) of the mixture of MIA (**1**) and  $[\text{}^2\text{H}_6]\text{MIA}$  (**5**), produced by feeding L- $[\text{}^2\text{H}_8]\text{Trp}$  into the *NosL*-expressing *E. coli* strain SL4101.

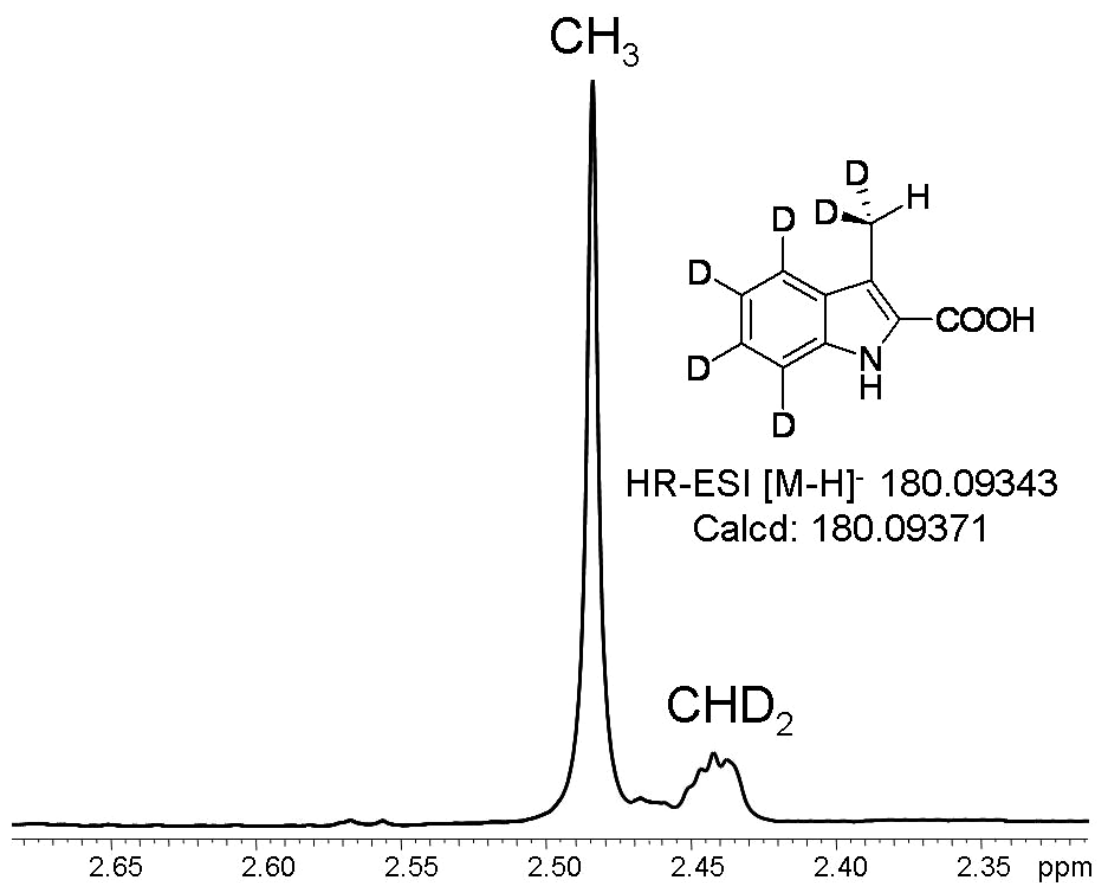

**Supplementary Figure 9.** GC-EI-MS analysis of 3-methylindole (**6**) production in NosL-catalyzed *in vitro* conversion (a and b, respectively, for GC and its coupled EI-MS spectra), using the authentic compound as the standard (c and d, respectively, for GC and its coupled EI-MS spectra).

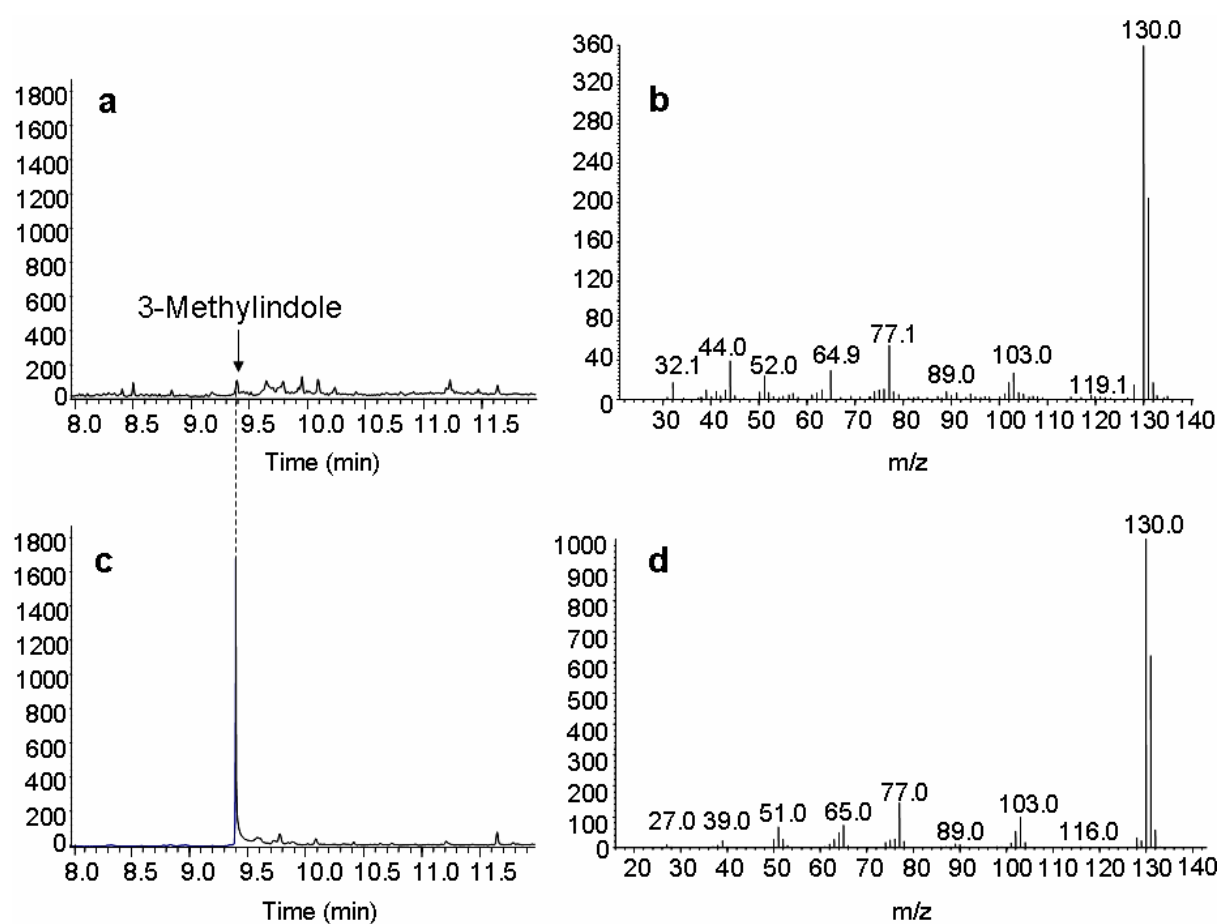

**Supplementary Figure 10.** Characterization of glyoxylate-NDP (**8**), the derivative of glyoxylate (**7**) in

NosL-catalyzed *in vitro* conversion, showing the structure, UV absorption, and negative mass ionization.

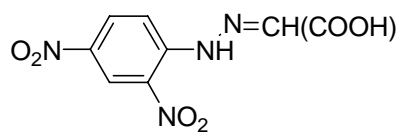

Chemical Formula: C<sub>8</sub>H<sub>6</sub>N<sub>4</sub>O<sub>6</sub>

Molecular Weight: 254.03

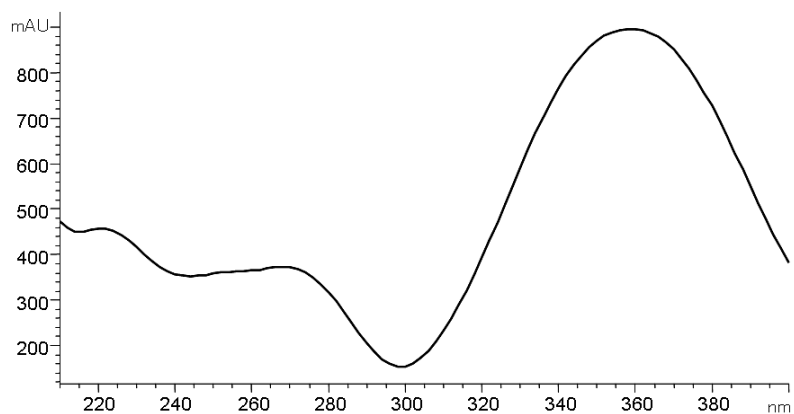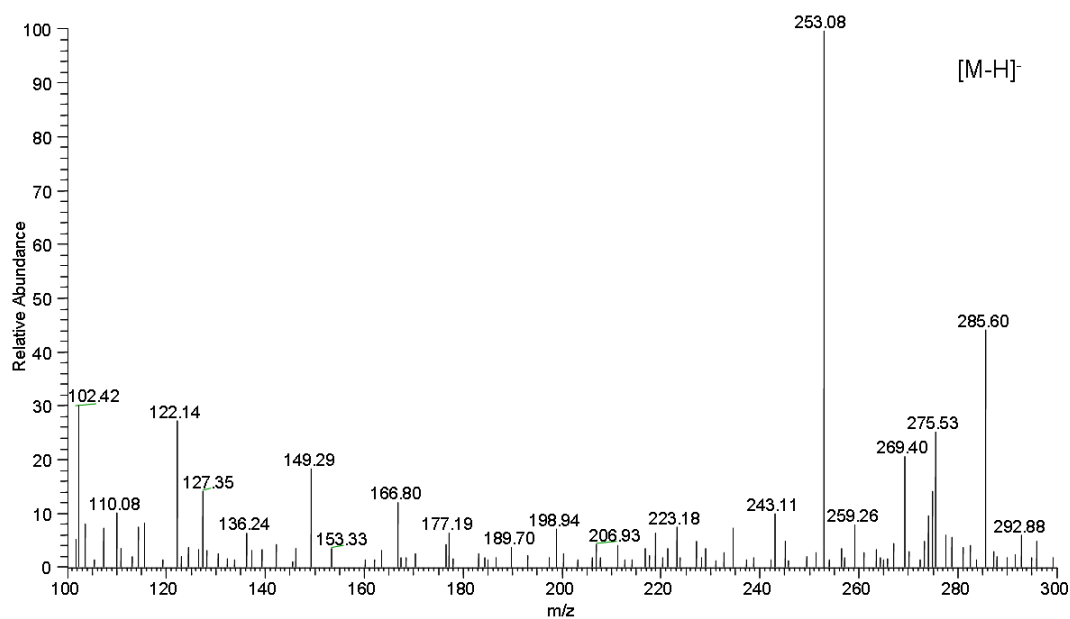

**Supplementary Figure 11.** Characterization of formaldehyde-NDP (**10**), the derivative of formaldehyde (**9**)

in NosL-catalyzed *in vitro* conversion, showing the structure, UV absorption, and negative mass ionization.

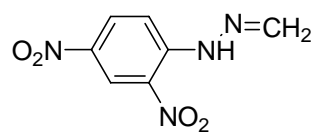

Chemical Formula:  $C_7H_6N_4O_4$

Molecular Weight: 210.04

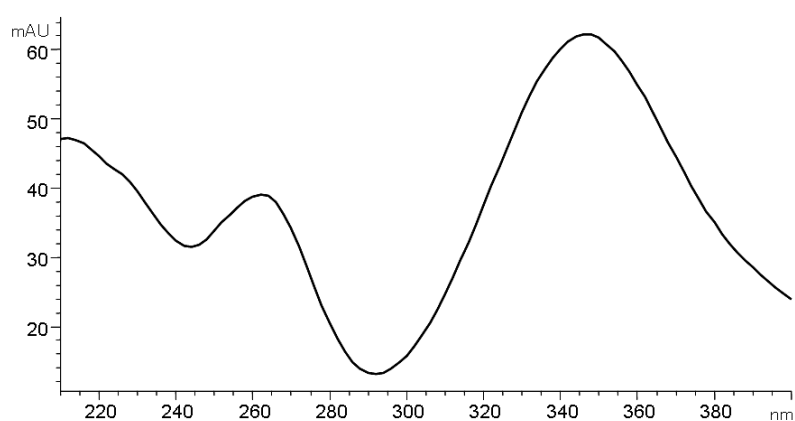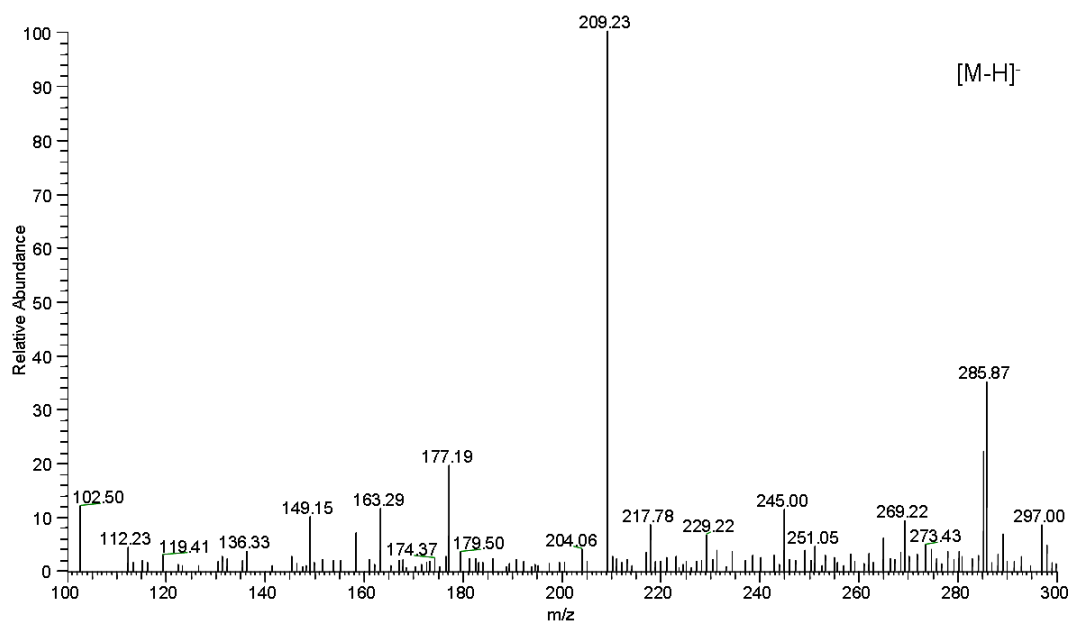

**Supplementary Figure 12.** Plot of the spin densities of L-Trp neutral radical (**11**). Most of the spin densities of **11** are distributed on the indole C3.

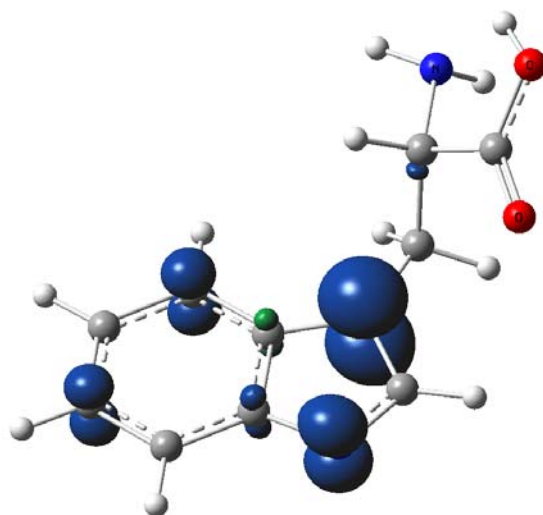

**Supplementary Figure 13.** Structures and relative free energies of the cleavage products of L-Trp neutral radical (11). 13-2 is the possible isomer of 13, 17-2 and 17-3 are the possible isomers of 17, etc. The relative free energies including solvent effect  $\Delta G_{sol}$  are in kcal/mol.

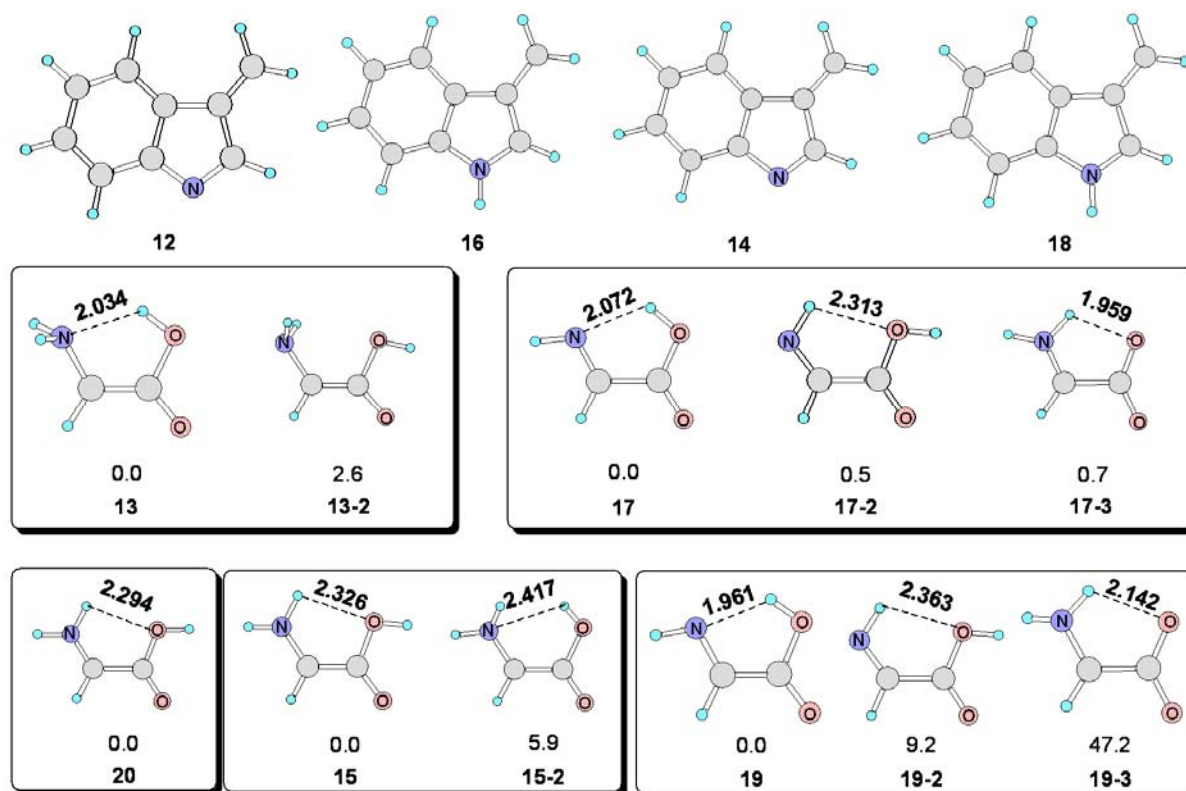

**Supplementary Figure 14.** Characterization of Gly-Dansyl (**22**), the putative derivative of glycine radical (**21**) in NosL-catalyzed *in vitro* conversion, showing the structure, UV absorption, and positive mass ionization.

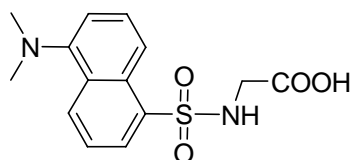

Chemical Formula:  $C_{14}H_{16}N_2O_4S$

Molecular Weight: 308.03

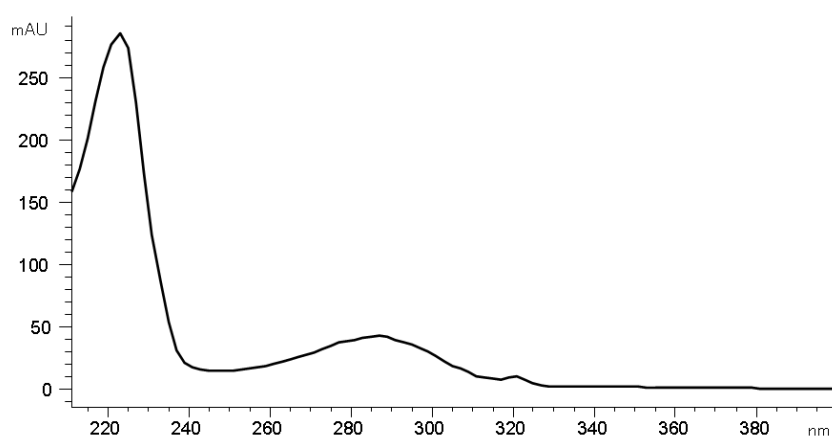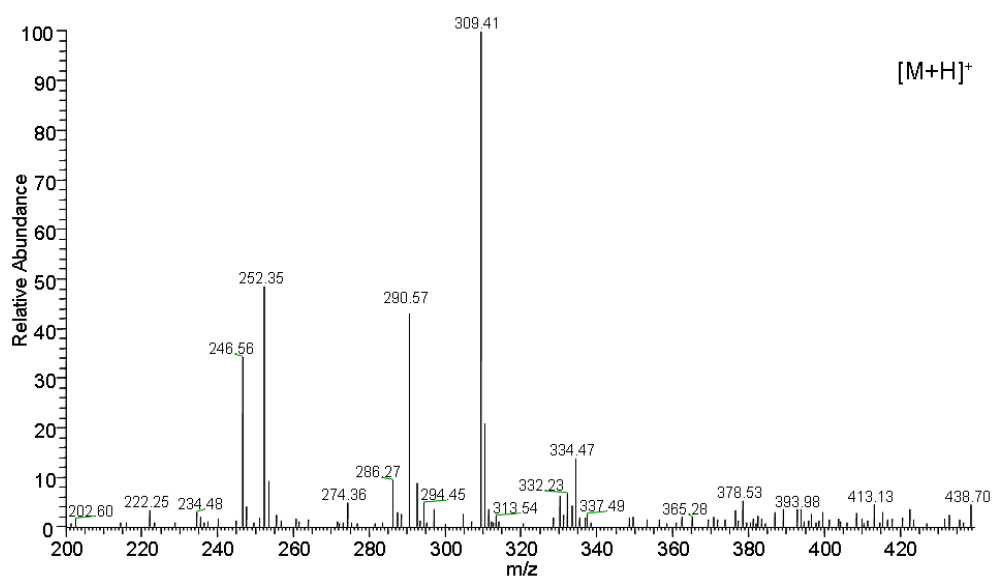

**Supplementary Figure 15.** Characterization of Met-Dansyl (**24**), the derivative of L-Met (**23**) in NosL-catalyzed *in vitro* conversion, showing the structure, UV absorption, and positive mass ionization.

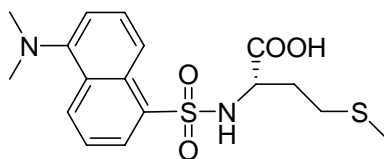

Chemical Formula:  $C_{17}H_{22}N_2O_4S_2$

Molecular Weight: 382.10

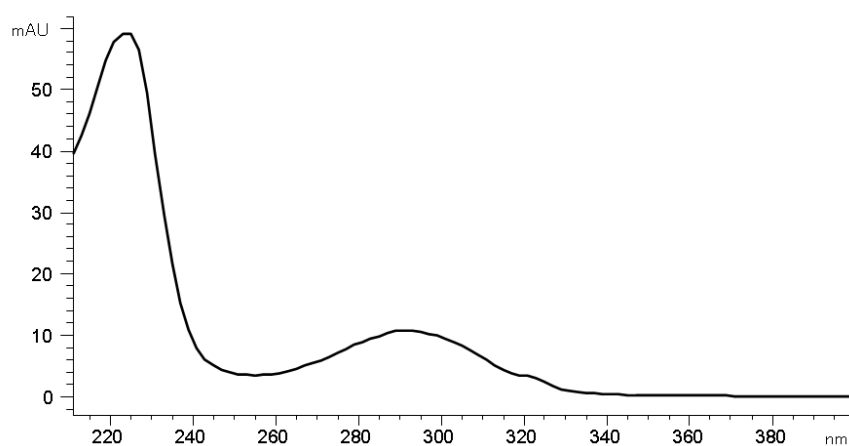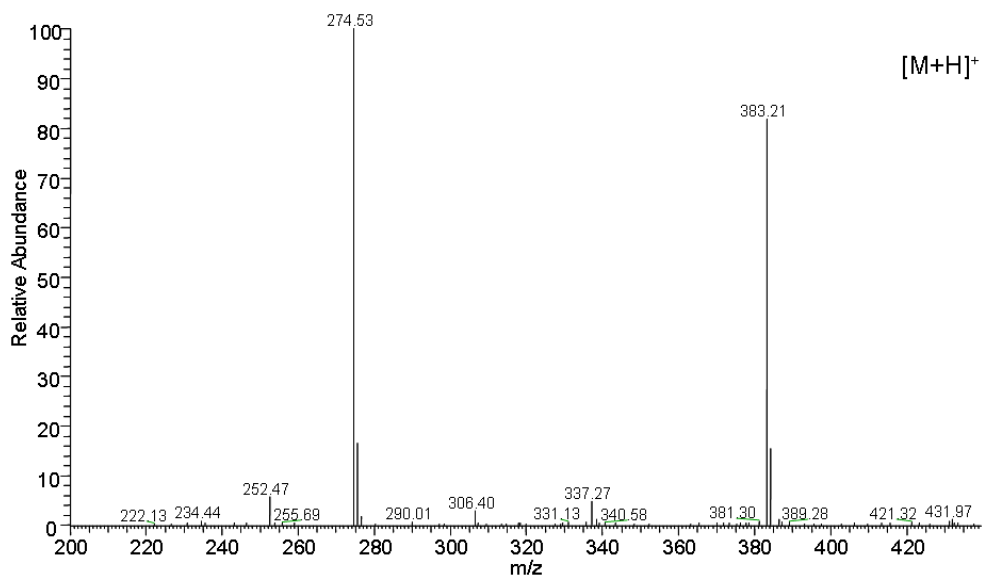

**Supplementary Figure 16.** HPLC analysis of the production of fluorinated MIAs in *E. coli* strains.

SL4100 (carrying the vector pET28a) with the supplementation of 5-fluoro-DL-Trp (I) and 6-fluoro-DL-Trp (II), respectively, and SL4101 (*nosL* expressing) with the supplementation of 5-fluoro-DL-Trp (III) and 6-fluoro-DL-Trp (IV), respectively.

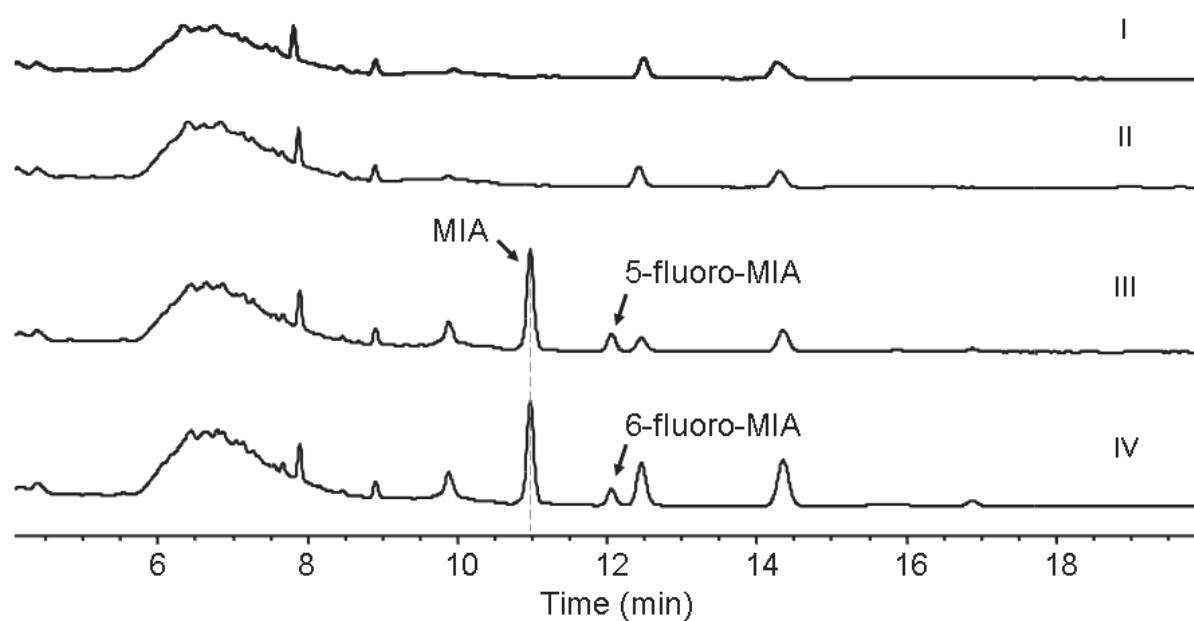

**Supplementary Figure 17.**  $^{19}\text{F}$  NMR spectra of fluorinated MIAs. (a) 5-Fluoro-MIA (**25**). (b) 6-Fluoro-MIA (**26**).

**a**

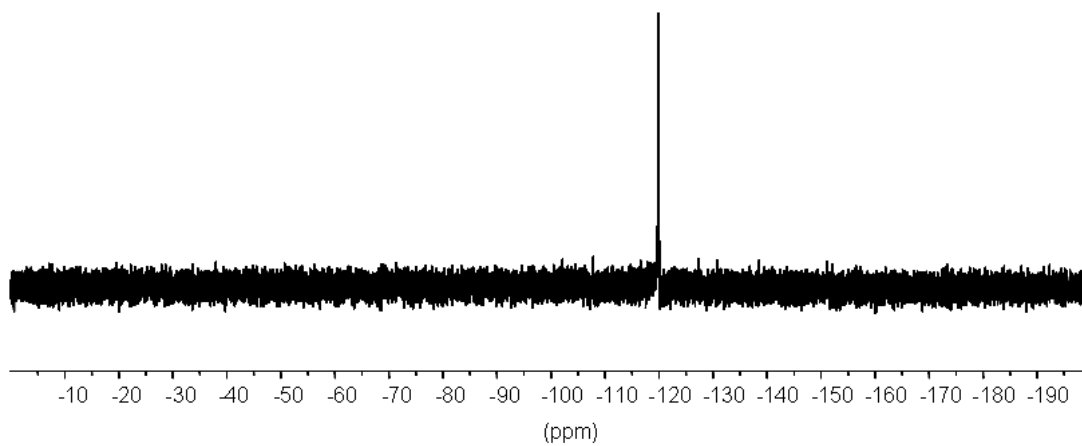

**b**

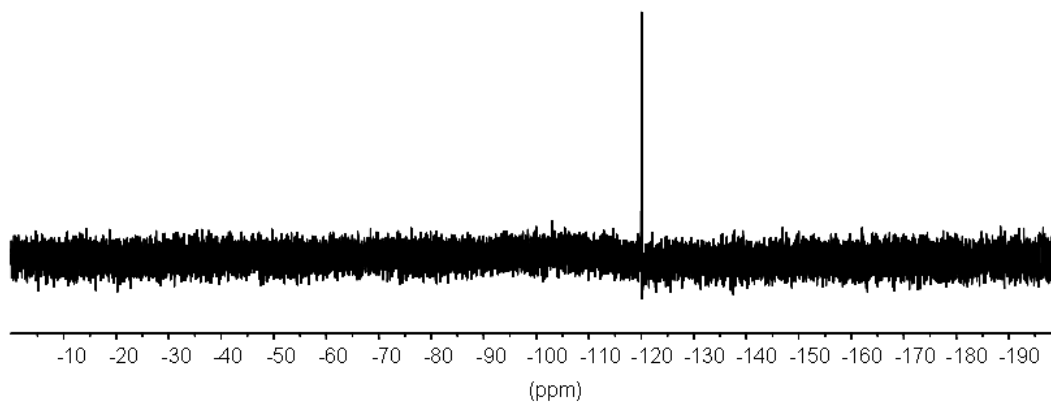

**Supplementary Figure 18.** Characterization of 5'-Fluoro-NOS (**27**), showing the structure, UV absorptions, and positive mass ionization.

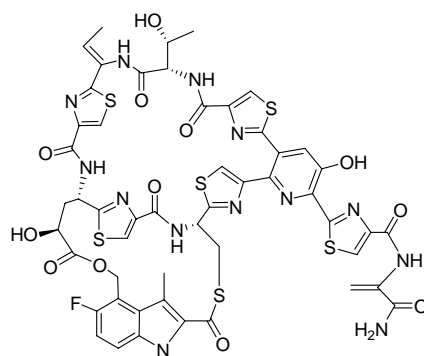

5'-fluoro-NOS, **27**

Chemical Formula:  $C_{51}H_{42}FN_{13}O_{12}S_6$

Molecular Weight: 1239.14

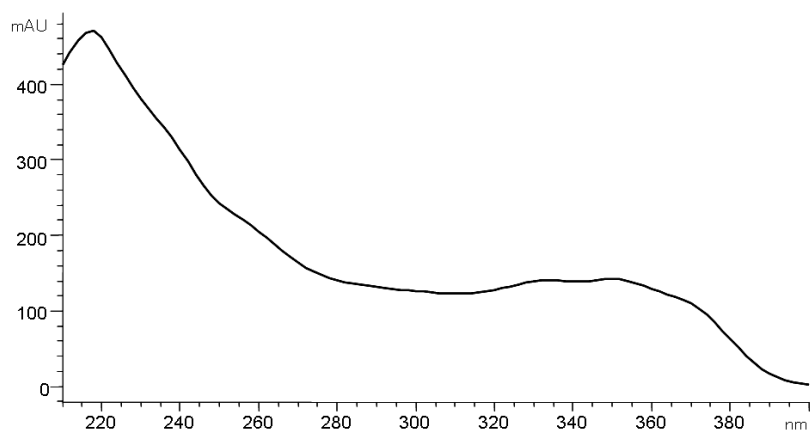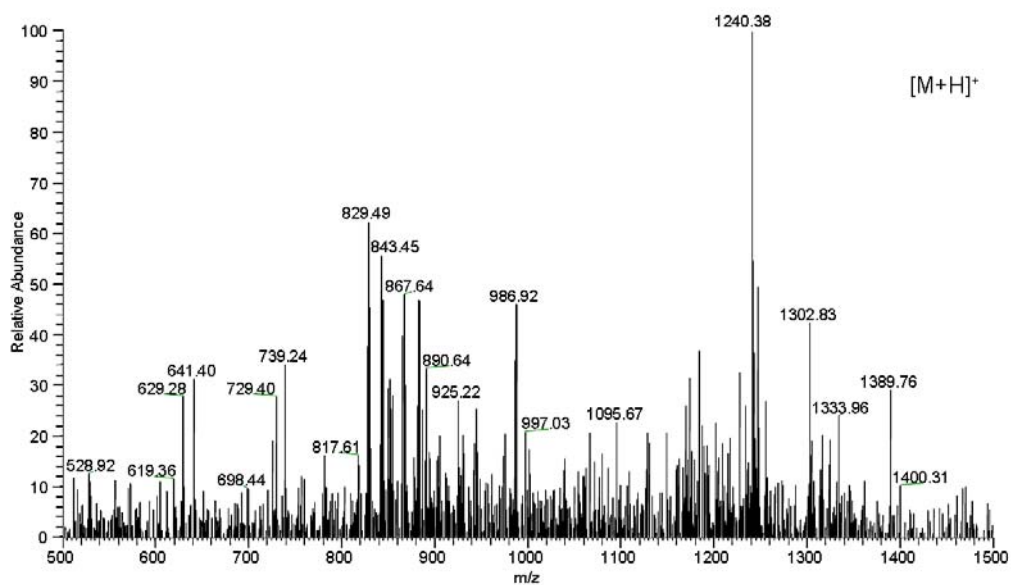

**Supplementary Figure 19.** Spectra of 5'-fluoro-NOS (**27**) for structural elucidation. (a) ESI-MS/MS spectrum (positive ion scanning). (b)  $^1\text{H}$  NMR (600MHz,  $\text{d}_8\text{-THF}$ ). (c)  $^{13}\text{C}$  NMR (150MHz,  $\text{d}_8\text{-THF}$ ). (d)  $^1\text{H}$ - $^1\text{H}$  COSY (600MHz,  $\text{d}_8\text{-THF}$ ). (e) HSQC (600MHz,  $\text{d}_8\text{-THF}$ ). (f)  $^{19}\text{F}$  NMR (376MHz,  $\text{d}_6\text{-DMSO}$ ).

**a**

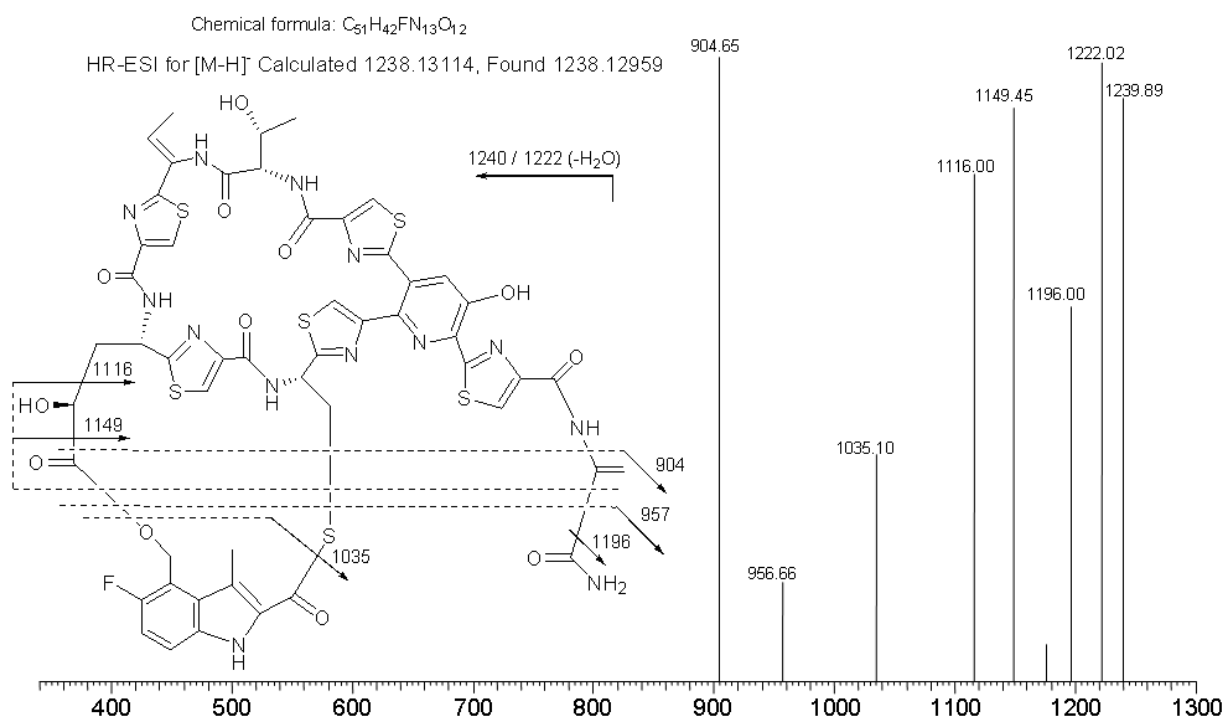

b

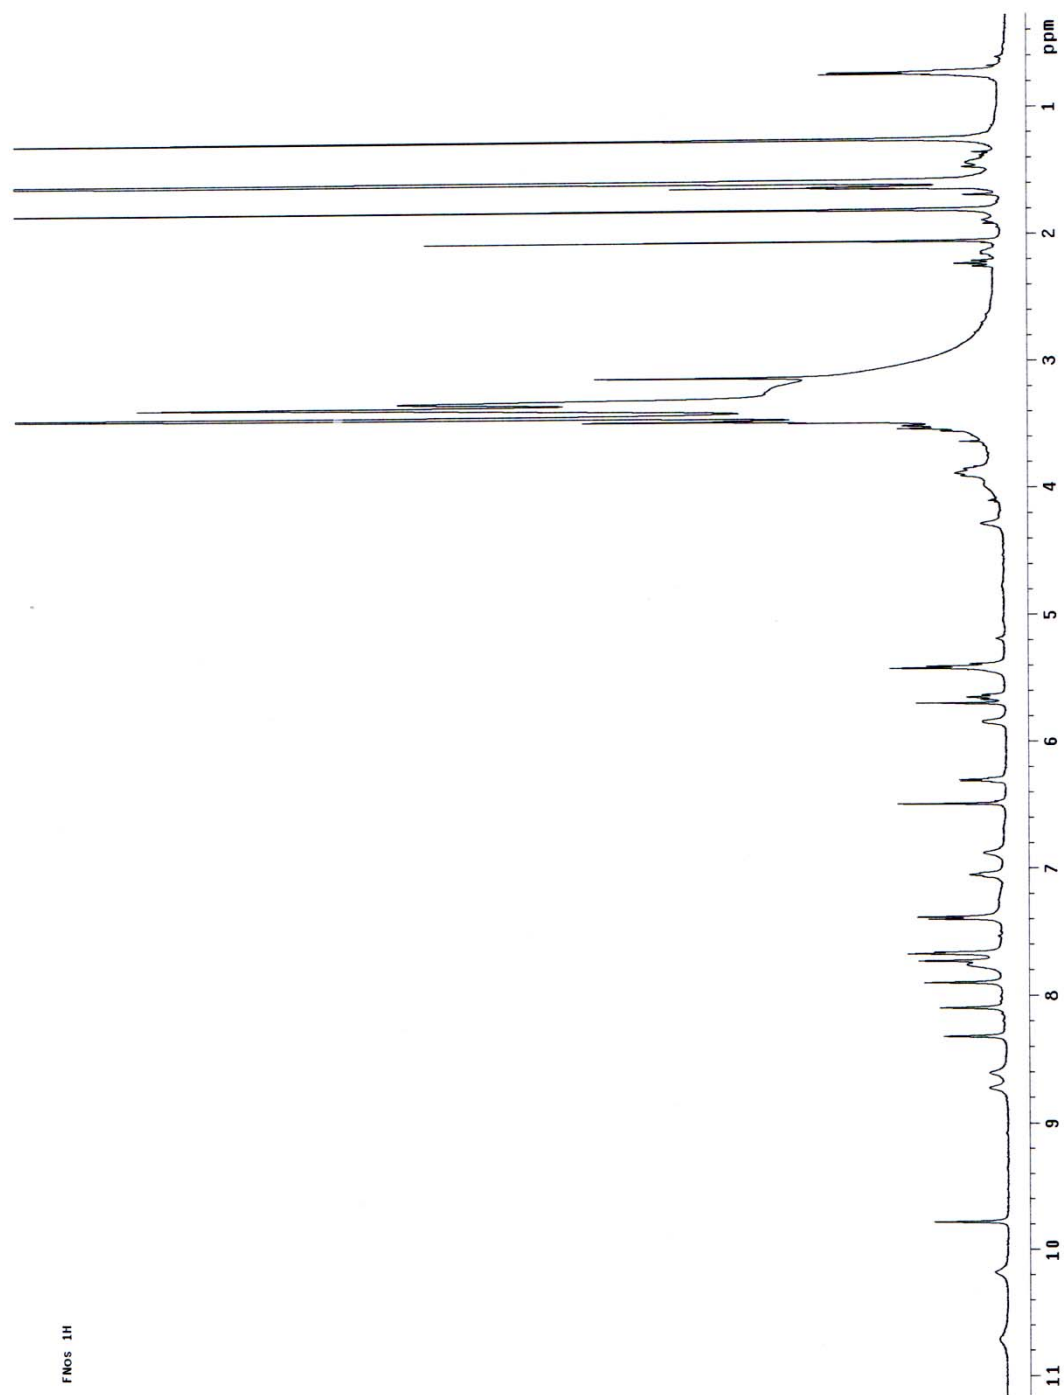

c

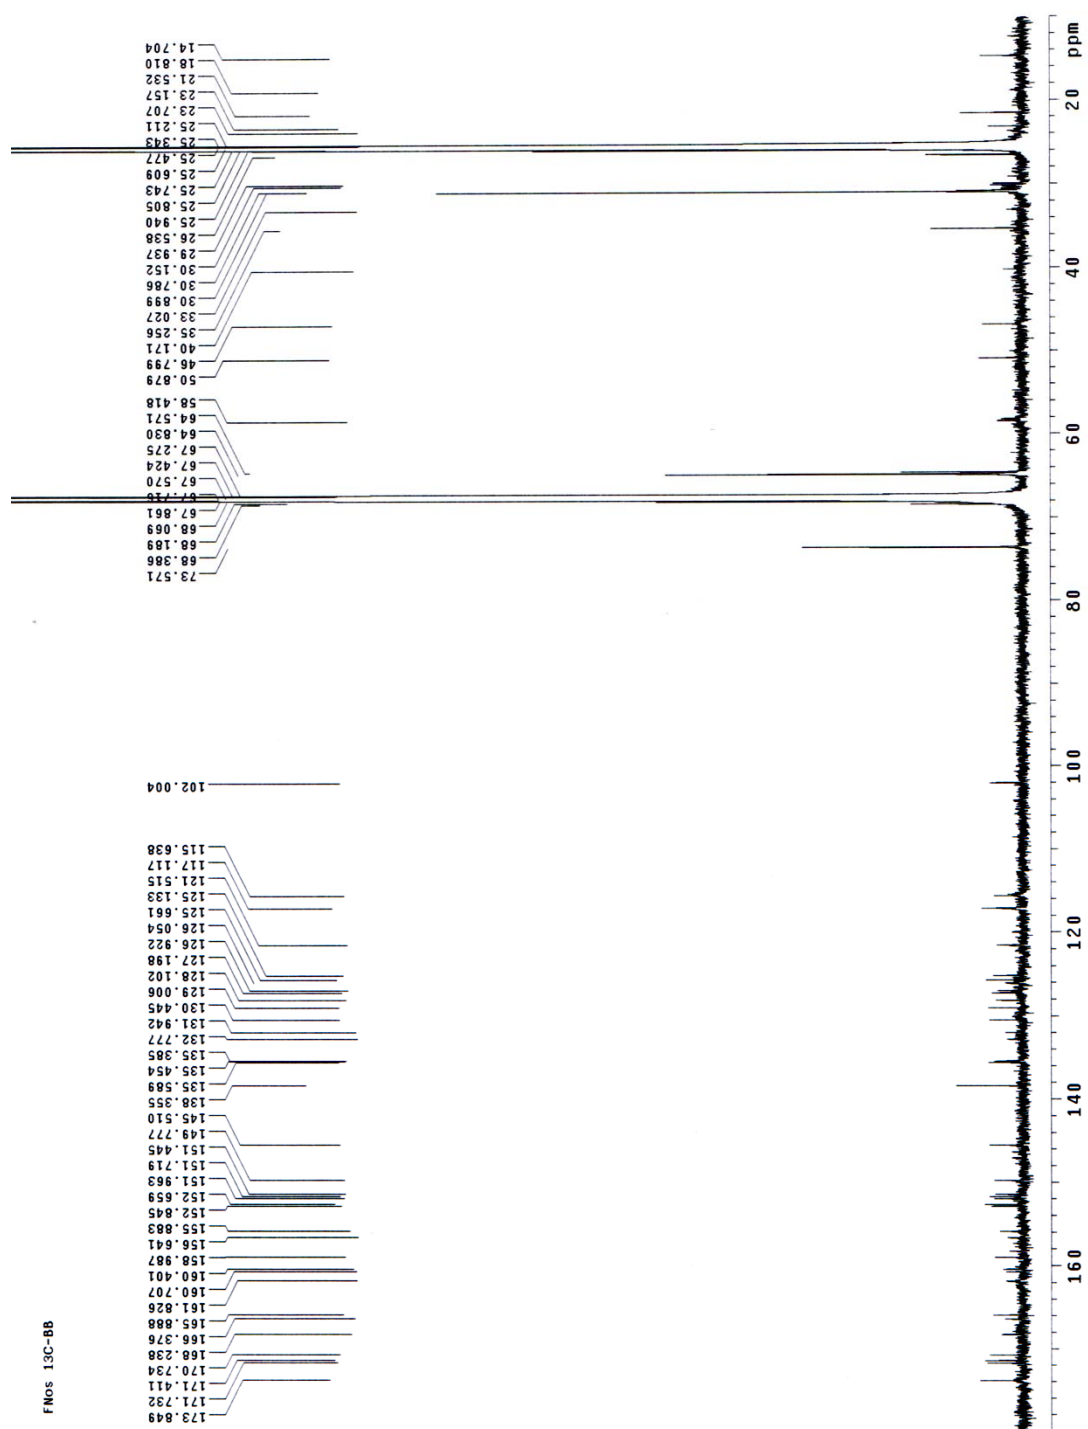

FNs 13C-88

d

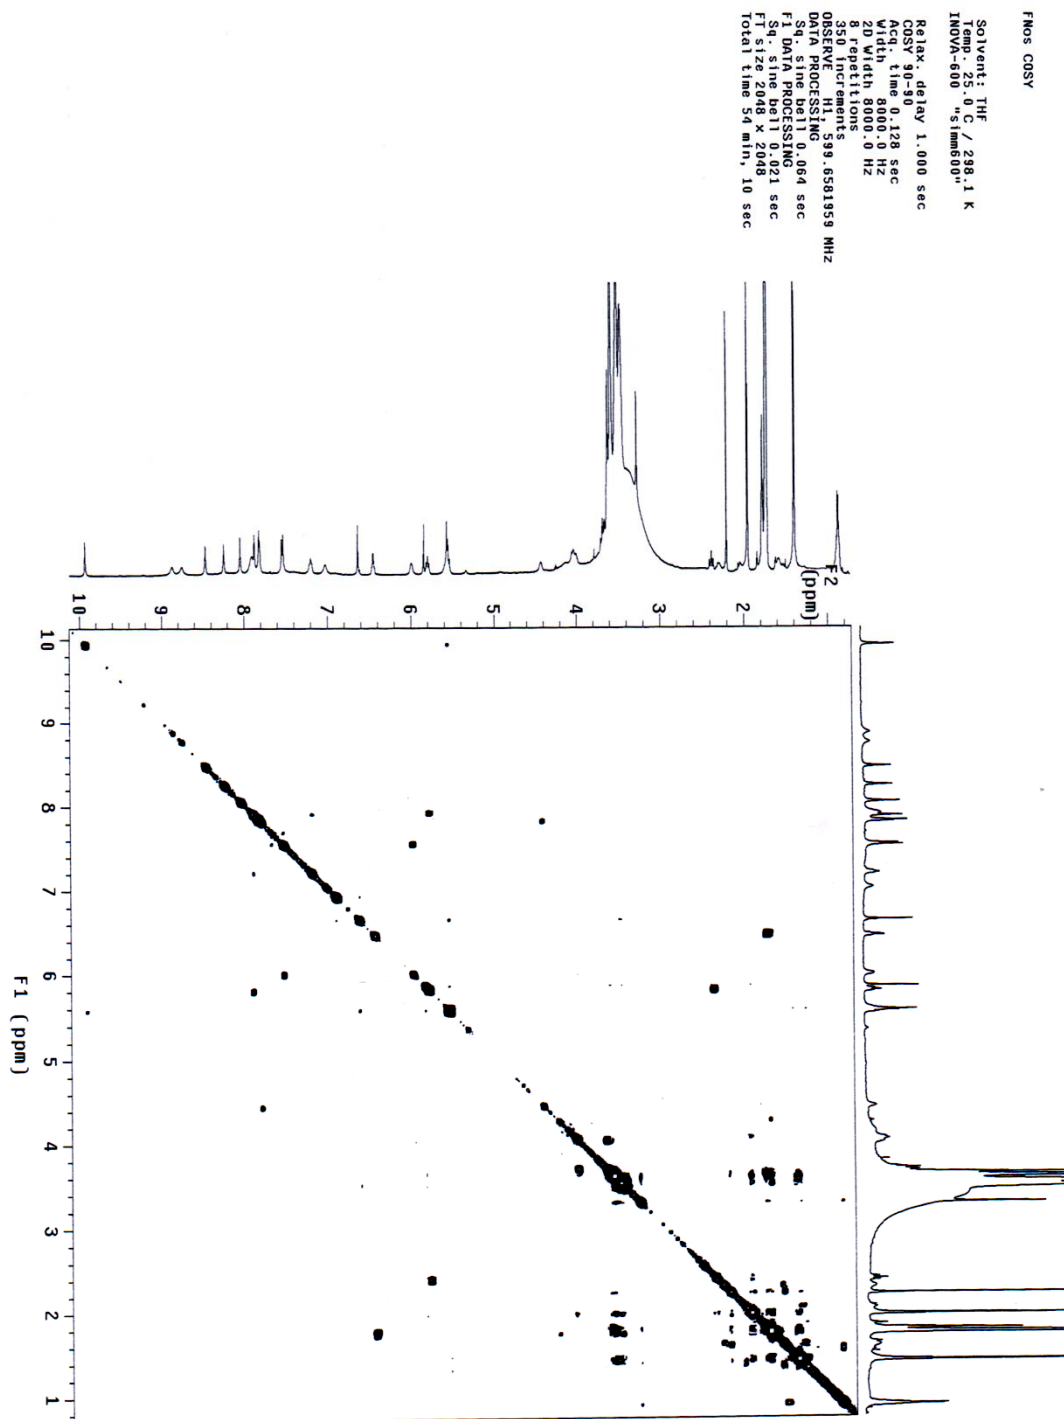

e

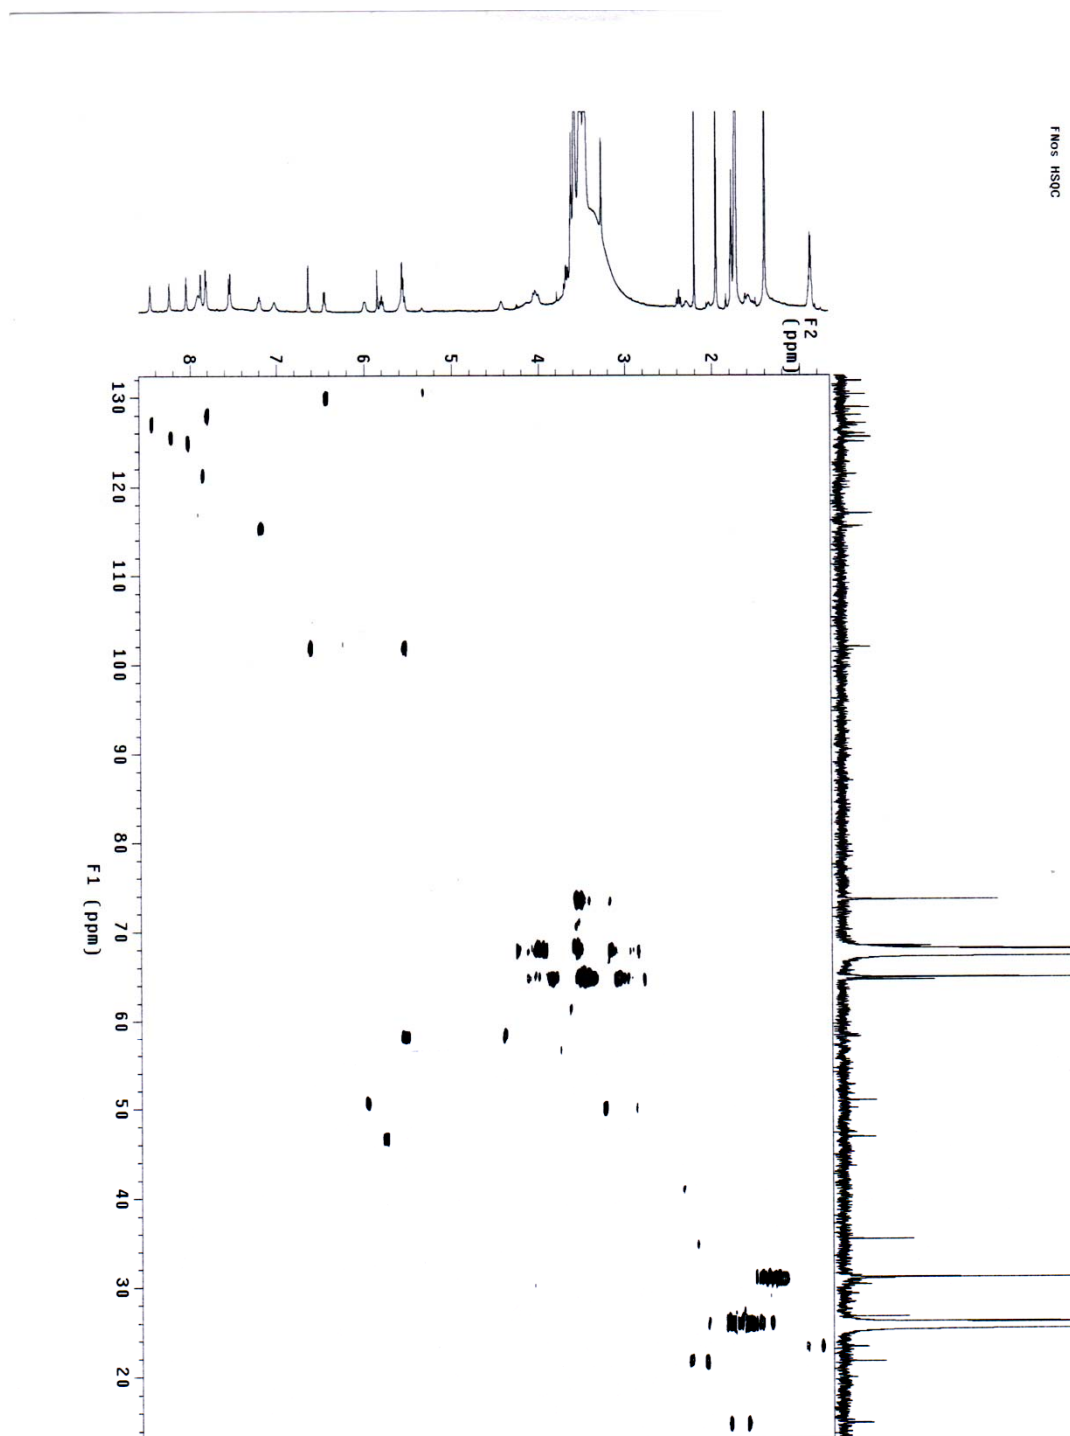

f

-126.454

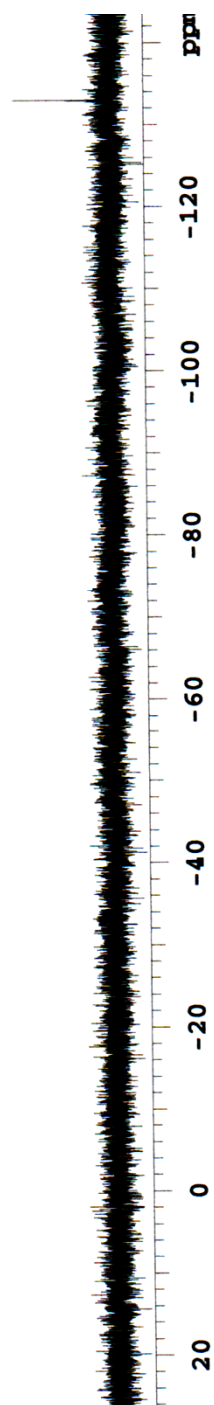

## 2.2 Supplementary Tables

**Supplementary Table 1.** Bacteria strains and plasmids used in this study

| Stain/Plasmid                | characteristics                                                                                                        | Reference  |
|------------------------------|------------------------------------------------------------------------------------------------------------------------|------------|
| <b>Stains</b>                |                                                                                                                        |            |
| <i>Escherichia coli</i> DH5α | Host for general cloning                                                                                               | Invitrogen |
| <i>E. coli</i> BL21 (ED3)    | Host for protein expression                                                                                            | Invitrogen |
| <i>E. coli</i> ATCC 37845    | <i>E. coli</i> containing a high copy number plasmid for producing tryptophan synthase from <i>Salmonella enterica</i> | ATCC, (8)  |
| SL4100                       | BL21 (ED3) derivative, containing the vector pET28a                                                                    | This study |
| SL4101                       | BL21 (ED3) derivative, containing pSL4101 for producing NosL                                                           | This study |
| SL4103                       | BL21 (ED3) derivative, containing pSL4103 for producing the C95A mutant NosL                                           | This study |
| SL4105                       | BL21 (ED3) derivative, containing pSL4105 for producing the C99A mutant NosL                                           | This study |
| SL4107                       | BL21 (ED3) derivative, containing pSL4107 for producing the C103A mutant NosL                                          | This study |
| SL4109                       | BL21 (ED3) derivative, containing pSL4109 for producing the G142A mutant NosL                                          | This study |

---

|                              |                                                                                      |            |
|------------------------------|--------------------------------------------------------------------------------------|------------|
| <i>Streptomyces actuosus</i> |                                                                                      |            |
| ATCC 25421                   | NOS-producing strain                                                                 | ATCC       |
| <b>Plasmids</b>              |                                                                                      |            |
| pSP72                        | <i>E. coli</i> subcloning vector                                                     | Promega    |
| pET28a                       | Vector for expression of 6x His-tagged protein in <i>E. coli</i>                     | Novagen    |
| pSL4001                      | pOJ446-based cosmid that contains the NOS biosynthetic gene cluster.                 | (2)        |
| pSL4100                      | pSP72 derivative, containing a 1.2 kb PCR product that encodes NosL                  | This study |
| pSL4101                      | pET28a derivative, containing a 1.2 kb PCR product that encodes NosL                 | This study |
| pSL4102                      | pSP72 derivative, containing a 1.2 kb PCR product that encodes the C95A mutant NosL  | This study |
| pSL4103                      | pET28a derivative, containing a 1.2 kb PCR product that encodes the C95A mutant NosL | This study |
| pSL4104                      | pSP72 derivative, containing a 1.2 kb PCR product that encodes the C99A mutant NosL  | This study |
| pSL4105                      | pET28a derivative, containing a 1.2 kb PCR product that encodes the C99A mutant NosL | This study |
| pSL4106                      | pSP72 derivative, containing a 1.2 kb PCR product that encodes the C102A mutant NosL | This study |

---

---

|         |                                                                                          |            |
|---------|------------------------------------------------------------------------------------------|------------|
| pSL4107 | pET28a derivative, containing a 1.2 kb PCR product<br>that encodes the C102A mutant NosL | This study |
| pSL4108 | pSP72 derivative, containing a 1.2 kb PCR product<br>that encodes the G142A mutant NosL  | This study |
| pSL4109 | pET28a derivative, containing a 1.2 kb PCR product<br>that encodes the G142A mutant NosL | This study |
| pSL4110 | pET28a derivative, containing a 531bp PCR product<br>that encodes FldA                   | This study |
| pSL4111 | pET28a derivative, containing a 747 bp PCR<br>product that encodes Fpr                   | This study |

---

**Supplementary Table 2.** Primers (shown from 5' to 3') used in this study. Restriction sites are underlined.

|             |                                           |
|-------------|-------------------------------------------|
| NosL-for    | TTGAATTCATGACGCAGAACTCCCAGG (EcoRI)       |
| NosL-rev    | TTTAAGCTTTCAGACCGCCGGGACGCCTC (HindIII)   |
| NLC95A-for  | CTACACCACCAACTACGCCGACTCCGAGTGCAAG        |
| NLC95A-rev  | CTTGCACTCGGAGTCGGCGTAGTTGGTGGTGTAG        |
| NLC99A-for  | CTACTGCGACTCCGAGGCCAAGATGTGCTCCATG        |
| NLC995A-rev | CATGGAGCACATCTTGGCCTCGGAGTCGCAGTAG        |
| NLC103A-for | CTCCGAGTGCAAGATGGCCTCCATGCGGAAGGGC        |
| NLC103A-rev | GCCCTTCCGCATGGAGGCCATCTTGCACTCGGAG        |
| NLG142A-for | GGTCGGCTTCCTCACCGCCGAGTACGAGGACAAG        |
| NLG142A-rev | CTTGTCTCTCGTACTCGGCGGTGAGGAAGCCGACC       |
| NLE143D-for | GCTTCCTCACCGGCGACTACGAGGACAAGCACAC        |
| NLE143D-rev | GTGTGCTTGTCTCTCGTAGTCGCCGGTGAGGAAGC       |
| FldA-for    | AAGAATTCATGGCTATCACTGGCATCTTTTTC (EcoRI)  |
| FldA-rev    | AAGTCGACTCAGGCATTGAGAATTCGTCG (Sall)      |
| Fpr-for     | TTTGAATTCATGGCTGATTGGGTAACAGGC (EcoRI)    |
| Fpr-rev     | TTTAAGCTTTTACCAGTAATGCTCCGCTGTC (HindIII) |

**Supplementary Table 3** Evaluation of the substrate specificity of NosL in the *nosL*-expressing *E. coli* strain SL4101.

| Substrate(s)                                                                        | Product(s)           | Characteristic(s)                                                                                                                          |
|-------------------------------------------------------------------------------------|----------------------|--------------------------------------------------------------------------------------------------------------------------------------------|
| 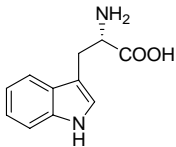   | MIA                  | Speeding up MIA production in the initial 4 hr, improved (~200%) in production compared to that of the control without the supplementation |
| 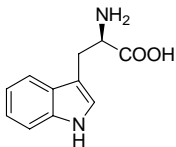   | MIA                  | No effect on MIA production                                                                                                                |
| 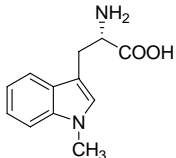  | MIA                  | No effect on MIA production                                                                                                                |
| 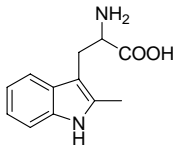 | MIA                  | No effect on MIA production                                                                                                                |
| 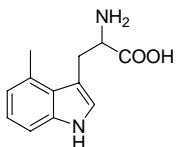 | MIA                  | No effect on MIA production                                                                                                                |
| 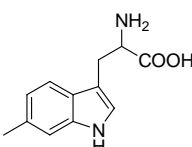 | MIA                  | No effect on MIA production                                                                                                                |
| 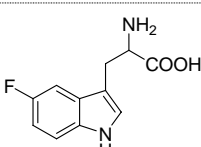 | MIA and 5-fluoro-MIA | No effect on MIA production                                                                                                                |
| 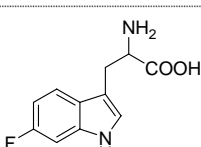 | MIA and 6-fluoro-MIA | No effect on MIA production                                                                                                                |

|                                                                                   |     |                             |
|-----------------------------------------------------------------------------------|-----|-----------------------------|
| 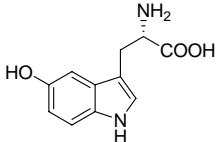 | MIA | No effect on MIA production |
| 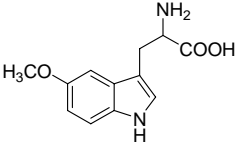 | MIA | No effect on MIA production |
| 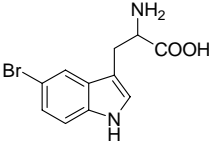 | MIA | No effect on MIA production |

**Supplementary Table 4** Assignment of  $^1\text{H}$  NMR and  $^1\text{H}$ - $^{13}\text{C}$  correlations (HSQC) of 5'-fluoro-NOS (**27**).

| Assignment | $^{13}\text{C}$ | $^1\text{H}$ chemical shift        | Assignment | $^{13}\text{C}$ | $^1\text{H}$ chemical shift |
|------------|-----------------|------------------------------------|------------|-----------------|-----------------------------|
| But3       | 130.45          | 6.33 (q, J = 7.00)                 | Cys2       | 50.88           | 5.86 (m)                    |
| Py4        | 129.01          | 7.70 (s)                           | Glu2       | 46.80           | 5.69 (t, J = 10.50)         |
| Thz (1) 5  | 128.10          | 7.72 (s)                           | Glu3       | 35.26           | 2.20 (m), 2.10 (m)          |
| Thz (5) 5  | 127.20          | 8.32 (s)                           | Cys3       | 29.94           | 3.89 (m)                    |
| Thz (3) 5  | 125.66          | 8.13 (s)                           | Thr CH3    | 23.16           | 0.75 (d, J = 6.50)          |
| Thz (2) 5  | 125.13          | 7.93 (s)                           | Ind CH3    | 21.53           | 2.09 (s)                    |
| Thz(4)     | 121.52          | 7.77 (s)                           | But CH3    | 14.70           | 1.67 (d, J = 6.00)          |
| Ind7       | 117.18          | 7.79 (m)                           | Ind NH     |                 | 10.67 (s, br)               |
| Ind6       | 115.64          | 7.09 (m)                           | Pyr OH     |                 | 10.19 (s, br)               |
| Deala3     | 102.00          | 6.52 E (s)                         | Deala NH   |                 | 9.813 (s)                   |
|            |                 | 5.45 Z (s)                         | But NH     |                 | 8.76 (s)                    |
| Thr 3      | 68.01           | 3.0-3.8,<br>overlapped with<br>THF | Glu OH     |                 | 8.63 (s,br)                 |
| Glu 4      | 64.57           | 3.0-3.8,<br>overlapped with<br>THF | Cys NH     |                 | 7.43 (d, J = 9.50)          |
| Thr 2      | 58.42           | 4.32 (m)                           | Thr NH     |                 | 7.43 (d, J = 9.50)          |
| Ind 4'     | 58.30           | 5.42 (m)                           | Thr OH     |                 | 6.89 (br)                   |

**Supplementary Table 5** Minimum inhibitory concentrations (MICs) of NOS and 5'-fluoro-NOS (27).

| Organism                 | Number <sup>a</sup> | MIC (μg/ml) |               |
|--------------------------|---------------------|-------------|---------------|
|                          |                     | NOS         | 5'-fluoro-NOS |
| <i>Bacillus subtilis</i> | SIPI-JD1001         | 0.008       | 0.004         |

<sup>a</sup> The test organisms were deposited at Shanghai Institute of Pharmaceutical Industry (SIPI) with the given numbers.

### 3. Supplementary References

1. Sambrook, J. & Russell, D.W. *Molecular Cloning: A Laboratory Manual*, 3rd ed (Cold Spring Harbor Laboratory Press, New York, 2001).
2. Yu, Y. *et al.* Nosiheptide biosynthesis featuring a unique indole side ring formation on the characteristic thiopeptide framework. *ACS Chem. Biol.* **4**, 855-864 (2009).
3. Kennedy, M.C. *et al.* Evidence for the formation of a linear [3Fe-4S] cluster in partially unfolded aconitase. *J. Biol. Chem.* **259**, 14463-14471 (1984).
4. Beinert, H. Semi-micro methods for analysis of labile sulfide and of labile sulfide plus sulfane sulfur in unusually stable iron sulfur proteins. *Anal. Biochem.* **131**, 373-378 (1983).
5. Houck, D.R., Chen, L.C., Keller, P.J., Beale, J.M. & Floss, H.G. Biosynthesis of the modified peptide antibiotic nosiheptide in *Streptomyces-actuosus*. *J. Am. Chem. Soc.* **110**, 5800-5806 (1988).
6. Goss, R.J.M. & Newill, P.L.A. A convenient enzymatic synthesis of L-halotryptophans. *Chem. Commun.* **47**, 4924-4925 (2006).
7. Rydon, H.N. The synthesis of the nuclear-C-methylated tryptophans - a note on the aldehyde reactions for tryptophan. *J. Chem. Soc.* **2**, 705-710 (1948).
8. Hohenberg, P. & Kohn, W. Inhomogeneous electron gas. *Phys. Rev.* **136**, B864-B871 (1964).
9. Kohn, W. & Sham, L.J. Self-consistent equations including exchange and correlation effects. *Phys. Rev.* **140**, A1133 (1965).
10. Frisch, M.J. *et al.* *Gaussian 03, Revision C.02* (Gaussian Inc., Wallingford CT, 2004).
11. Becke, A.D. Density-functional thermochemistry .3. The role of exact exchange. *Chem.Phys.* **98**, 5648-5652 (1993).

12. Lee, C.T., Yang, W.T. & Parr, R.G. Development of the colle-salvetti correlation-energy formula into a functional of the electron-density. *Phys. Rev.* **B37**, 785-789 (1988).
13. Cancès, E. Mennucci, B. & Tomasi, J. A new integral equation formalism for the polarizable continuum model: theoretical background and applications to isotropic and anisotropic dielectrics. *J. Chem. Phys.* **107**, 3032-3041 (1997).
14. Cossi, M., Barone, V., Mennucci, B. & Tomasi, J. Ab initio study of ionic solutions by a polarizable continuum dielectric model. *Chem. Phys. Lett.* **286**, 253-263 (1998).
15. Pucci, M.J. *et al.* Antimicrobial evaluation of nocathiacins, a thiazole peptide class of antibiotics. *Antimicrob. Agents. Chemother.* **48**, 3697-3701 (2004).
16. McFarland, J. The nephelometer - an instrument for estimating the number of bacteria in suspensions used for calculating the opsonic index and for vaccines. *J. Am. Med. Assoc.* **49**, 1176-1178 (1907).
